# Supplementary material for: Malfunction of airway basal stem cells plays a crucial role in pathophysiology of tracheobronchopathia osteoplastica
Source: PubMed Central journal article supplement (PMC8921516; doi:10.1038/s41467-022-28903-7), 2022-03-14
Supplement: 41467_2022_28903_MOESM1_ESM.pdf [file 41467_2022_28903_MOESM1_ESM.pdf]

## **SUPPLEMENTARY INFORMATION**

### **Malfunction of Airway Basal Stem Cells plays a crucial role in Pathophysiology of Tracheobronchopathia Osteoplastica**

Yue Hong\*, Shan Shan, Ye Gu, Haidong Huang, Quncheng Zhang, Yang Han, Yongpin Dong, Zeyu Liu, Moli Huang, Tao Ren\*

\* Corresponding authors

#### **Content including:**

SUPPLEMENTARY FIGURES AND LEGENDS

SUPPLEMENTARY TABLES

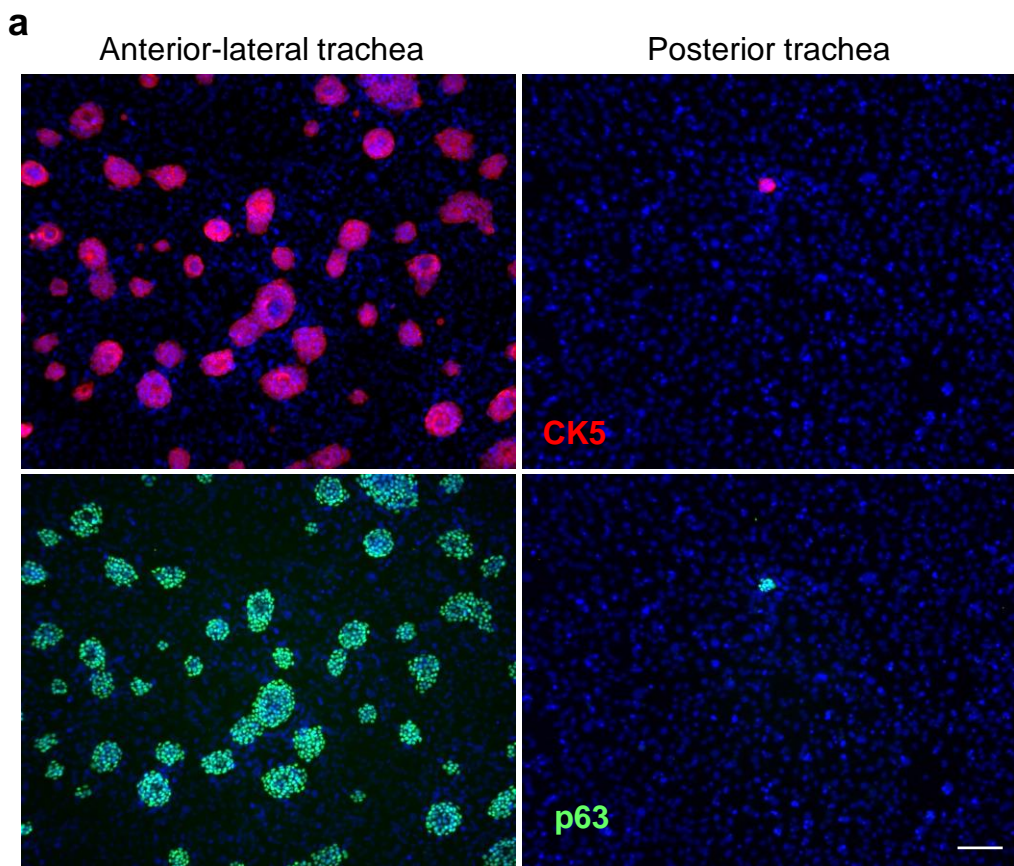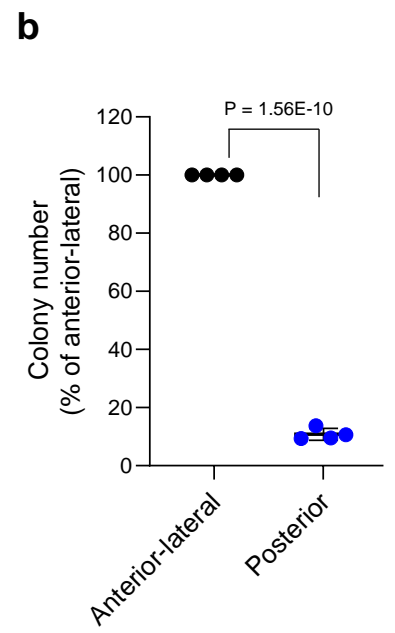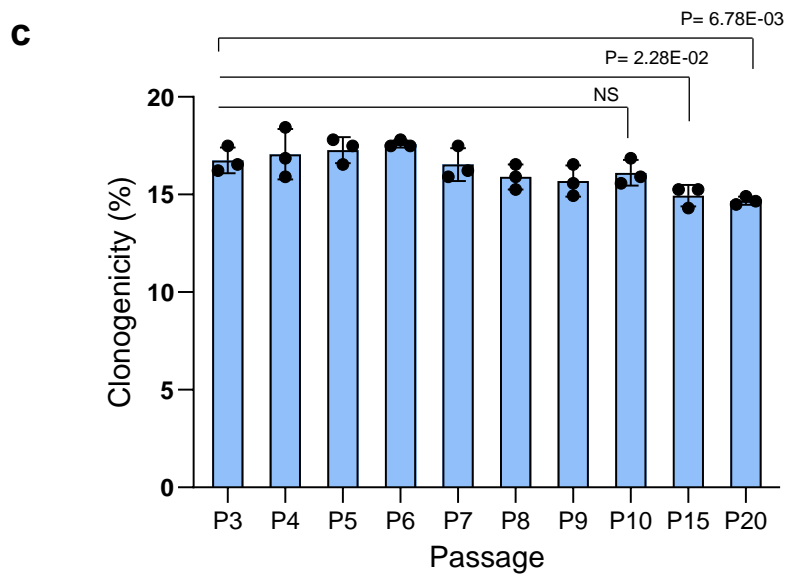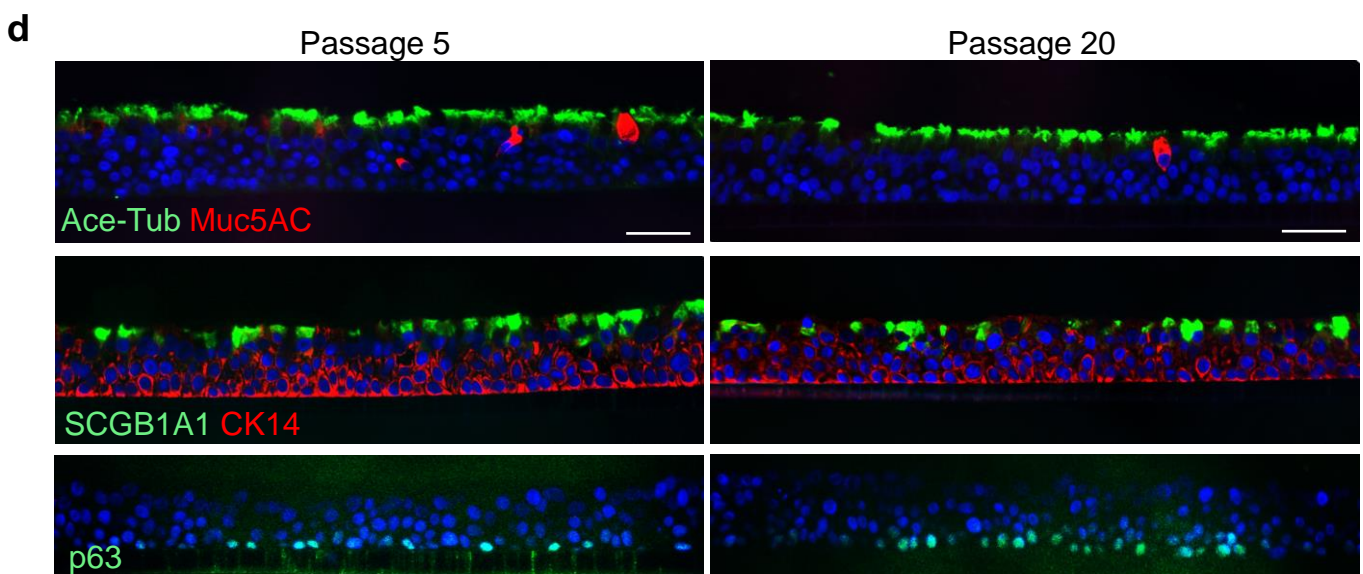

**Supplementary Figure 1. Spatial distribution of proliferative basal stem cells in human tracheas, and stability of cell maintenance in vitro.** (a) Representative images of primary cultures of tracheal stem cells derived from anterior-lateral and posterior portions of normal donors, respectively. Cell character was confirmed by immunofluorescent staining with basal cell markers, CK5 and p63. Scale bar, 200 $\mu$ m. (b) Scatter plot depicting clone numbers counted from sub-regional cultures of 4 independent biological samples, as percentage values of anterior-lateral counterparts. Bars represent mean  $\pm$  SD, and p value is indicated to show statistical significance. (c) Self-renewal ability of isolated normal basal stem cells was assessed by clonogenic assay, shown as percentage of plated cells that formed typical clones on Day 4-5 post-seeding from passage 3 to 20 (n=3 experimental repeats/passage). Results are represented as mean  $\pm$  SD, and p values are indicated to show statistical significance (<sup>NS</sup> p > 0.05). (d) Representative images showing differentiation ability of passaged cells examined by immunofluorescent staining of ALI sections (n=3 experimental repeats) with functional cell markers, acetylated tubulin (ciliated), Muc5AC (goblet), SCGB1A1 (club) and CK14, p63 (basal). Scale bar, 40 $\mu$ m. (b, c) two-tailed Student's t-tests. Source data are provided as a Source Data file.

**a** P4 clones

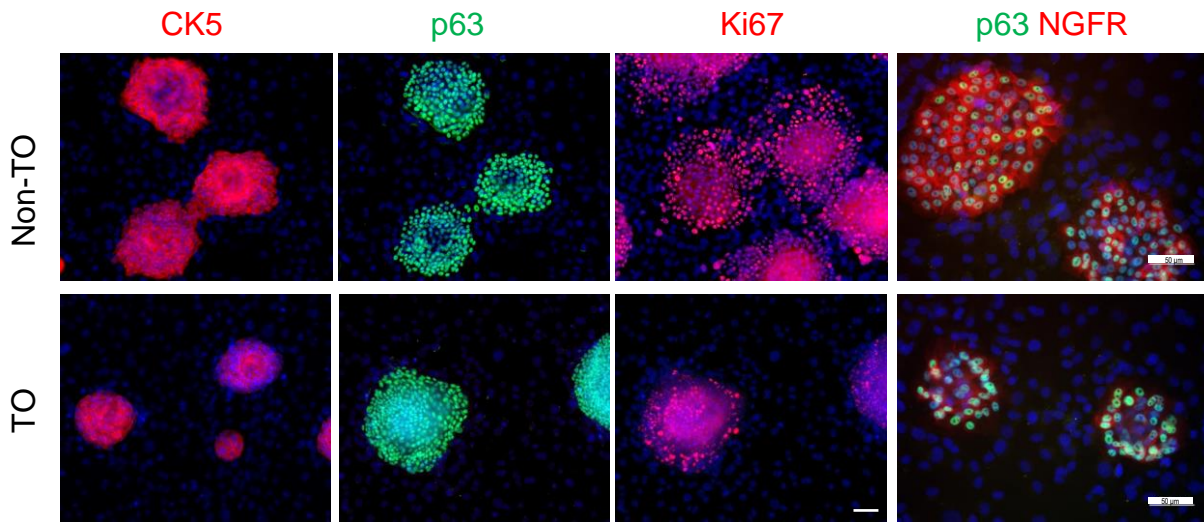

**b** P7 clones

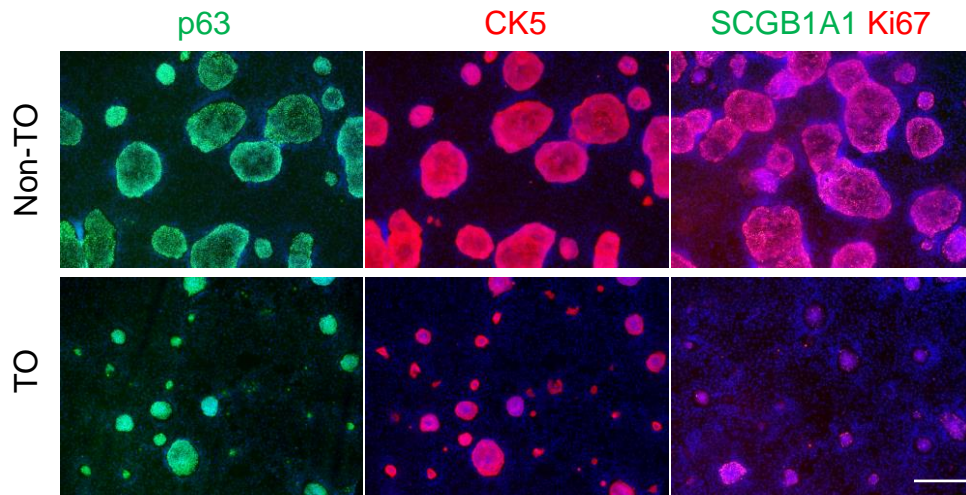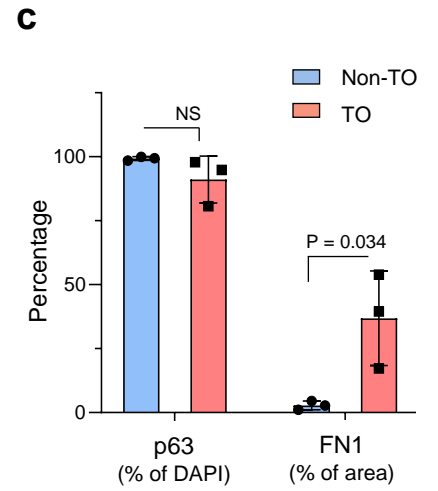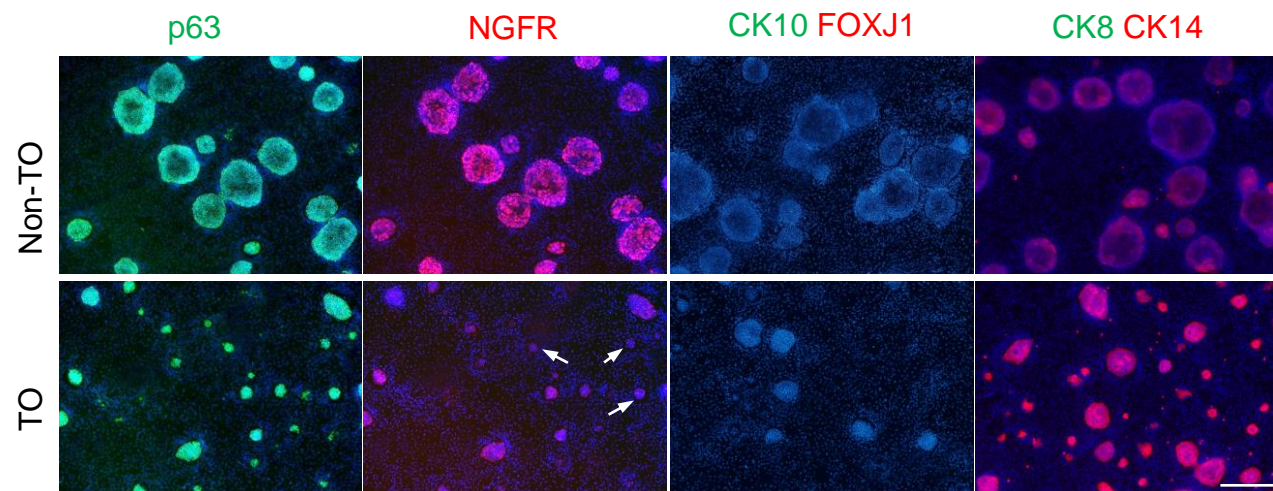

**Supplementary Figure 2. Characterization of isolated TBBCs derived from non-TO controls and TO patients.** (a) Representative immunofluorescent images showing the expression of key basal cell markers CK5, p63, NGFR and Ki67 on clones from P4 culture. Scale bar, 50 $\mu$ m. (b) Representative immunofluorescent images of clones from P7 culture stained with a panel of antibodies against basal cell markers (p63, CK5, NGFR and CK14), proliferation indicator (Ki67), differentiating marker (CK8) and cell-type specific markers (SCGB1A1, CK10, FOXJ1). Scale bar, 500 $\mu$ m. Cells with strong p63 immunoreactivity but almost no NGFR labeling are highlighted by white arrows as examples. (c) Quantification of immunofluorescence results from p63 and FN1 labelled TBBC monolayers using Fiji. For p63, results are presented as mean of percentage of positive cells in total DAPI nuclei via particle analysis; whilst for FN1, due to its diffuse pattern and deposition in extracellular space, results are presented as mean of area fraction. Error bars of  $\pm$ SD and p-values are indicated in the graph (<sup>NS</sup> p > 0.05). (a, b, c) n=3 biologically independent experiments. (c) two-tailed Student's t-tests. Source data are provided as a Source Data file.

**a**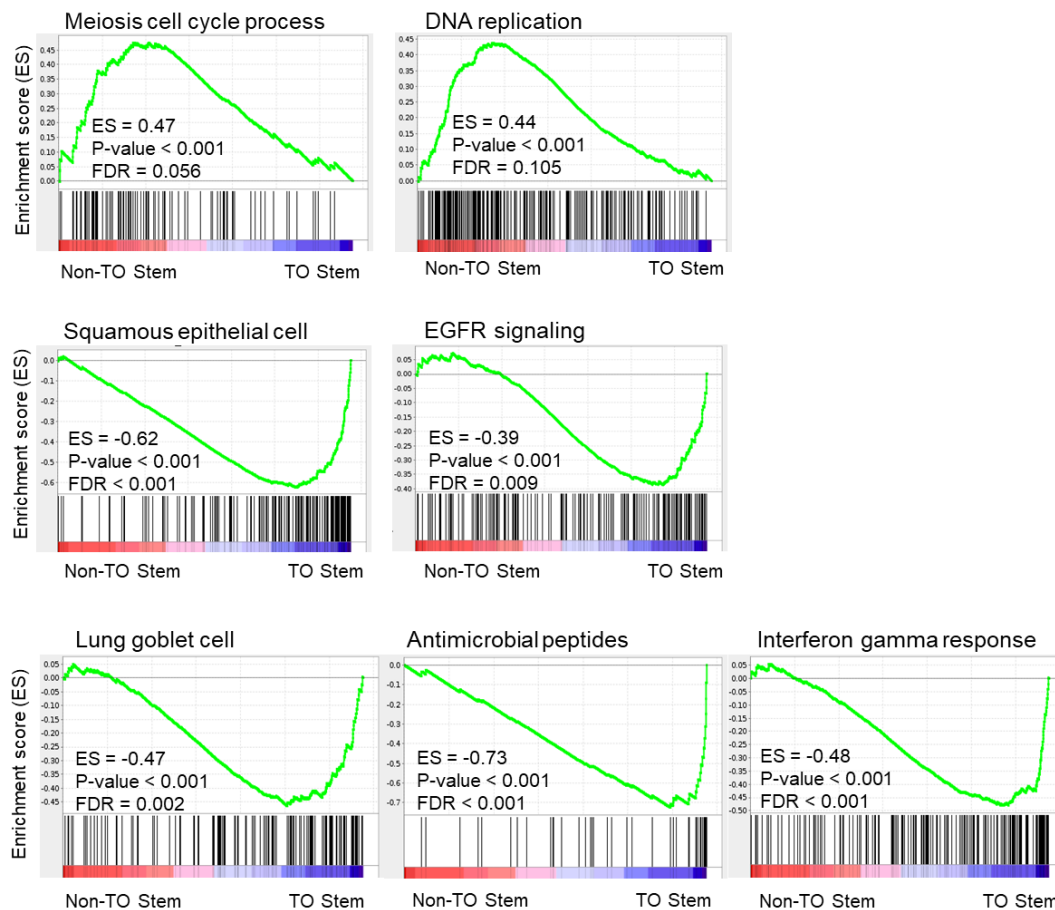**b**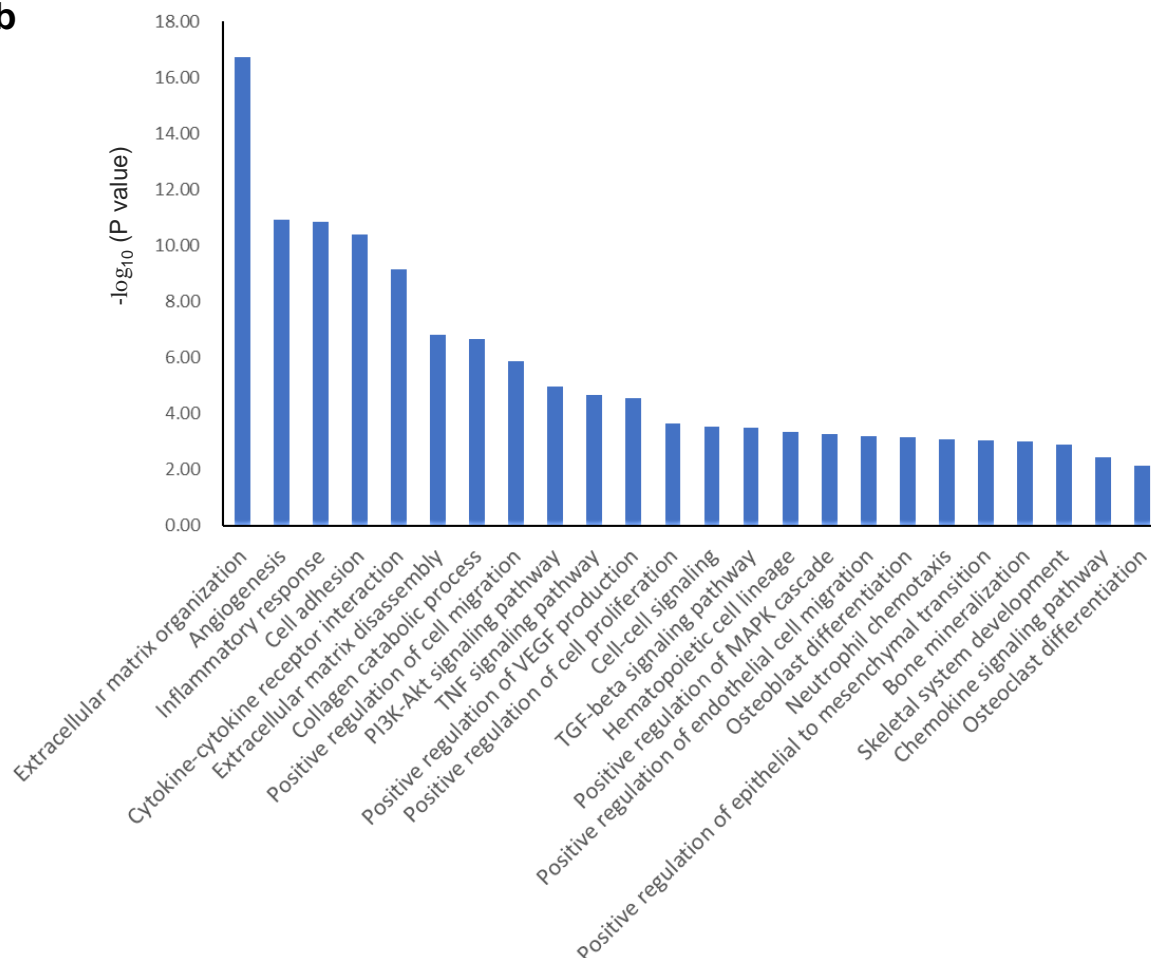

**Supplementary Figure 3. Enrichment analyses of RNA-Seq datasets generated from TBBC clones and corresponding ALI differentiated cells. (a)** Gene set enrichment analysis (GSEA) of basal cell RNA-Seq data. **(b)** GO and KEGG enrichment analysis of differentially expressing genes with further increment in severe TO cases (TO-02, 05, 06) compared to moderate cases (TO-01, -03, 04) according to ALI RNA-Seq data.

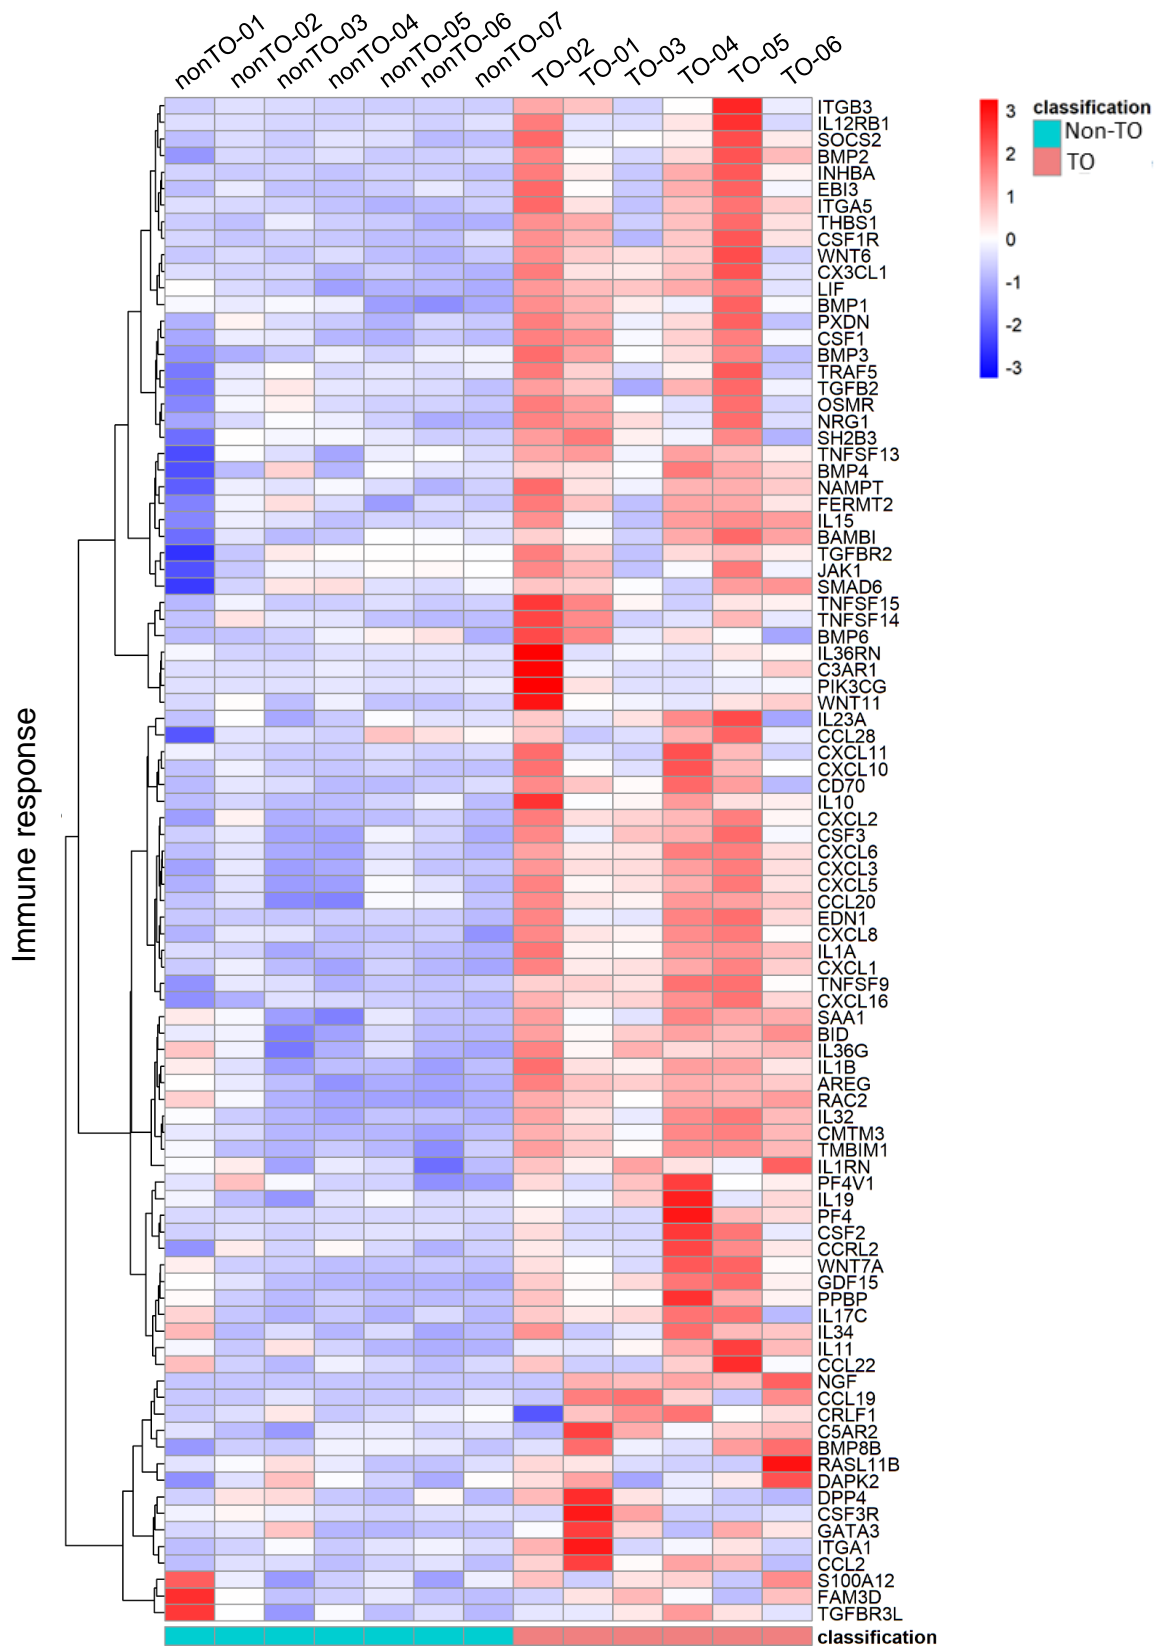

**Supplementary Figure 4. Comparative heatmap showing distinct expression profiles between non-TO and TO groups.** Differentially expressing genes involved in cytokine-cytokine receptor binding and chemotaxis events were selected to show in this heatmap across all non-TO controls and TO cases.

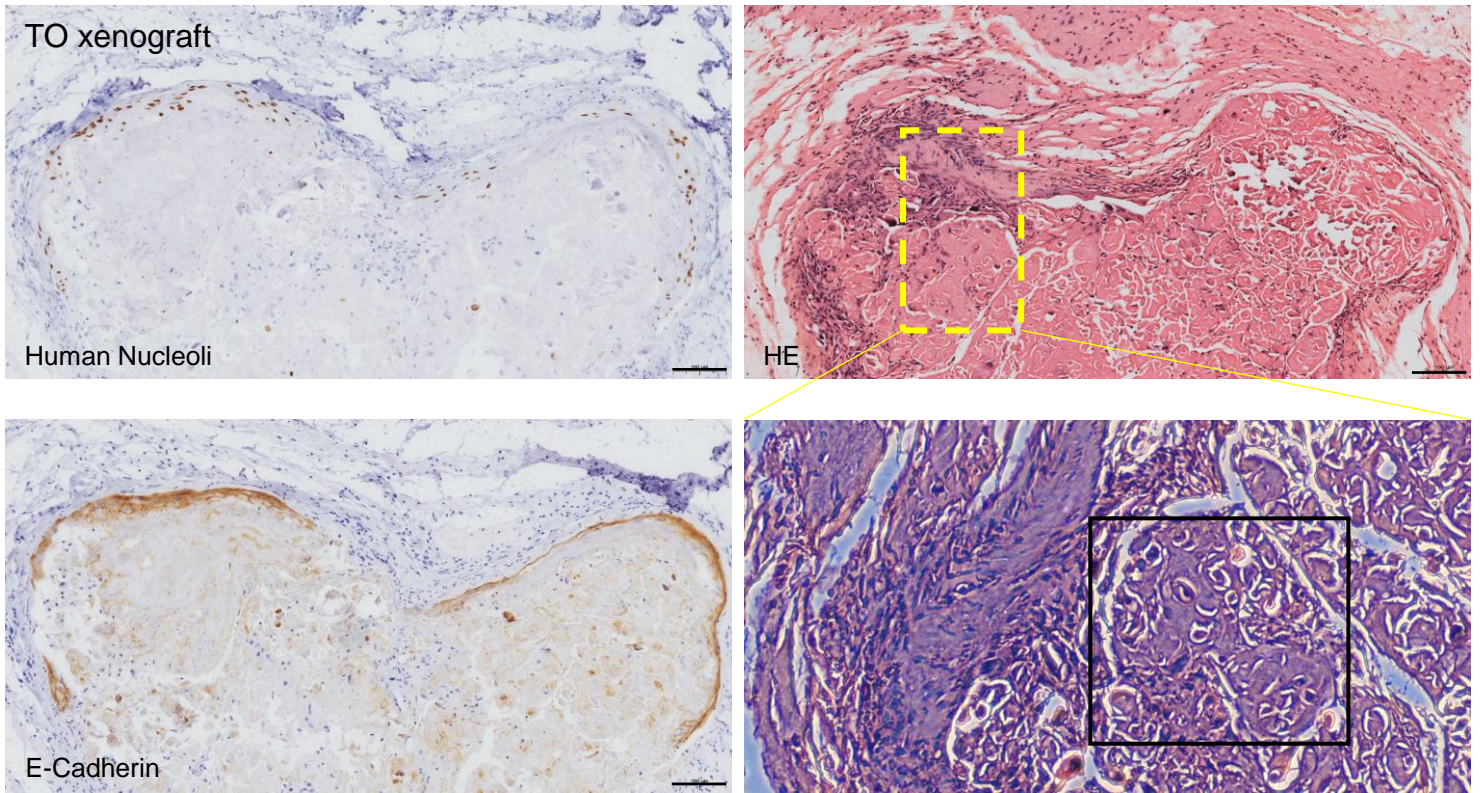

**Supplementary Figure 5. Histological sections showing a representative xenograft sample derived from TO-TBBCs transplantation, which contains a suspectable cartilaginous islet. HE, immunohistochemical staining against anti-human nucleoli and E-Cadherin were performed on serial sections, to identify the transplanted epithelial portion. Yellow dotted box indicates a field that has been magnified into a separate image, and the black box is highlighting a cartilaginous-like islet. n=1 biological sample. Scale bar, 100 $\mu$ m.**



**a**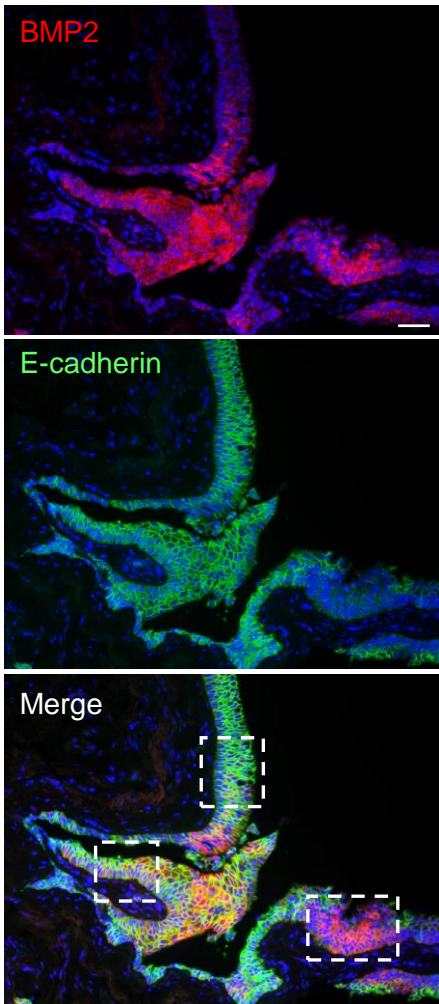

Magnified merge

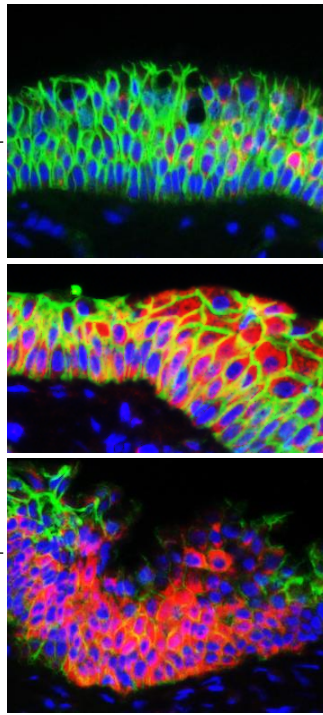**c**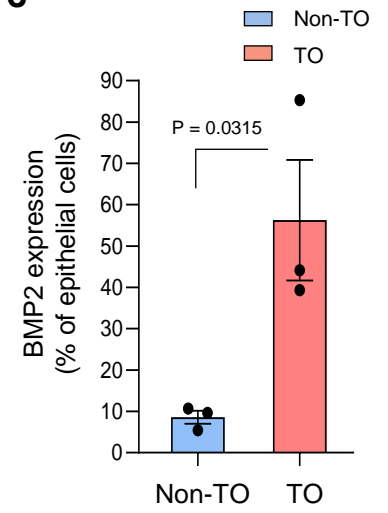**b**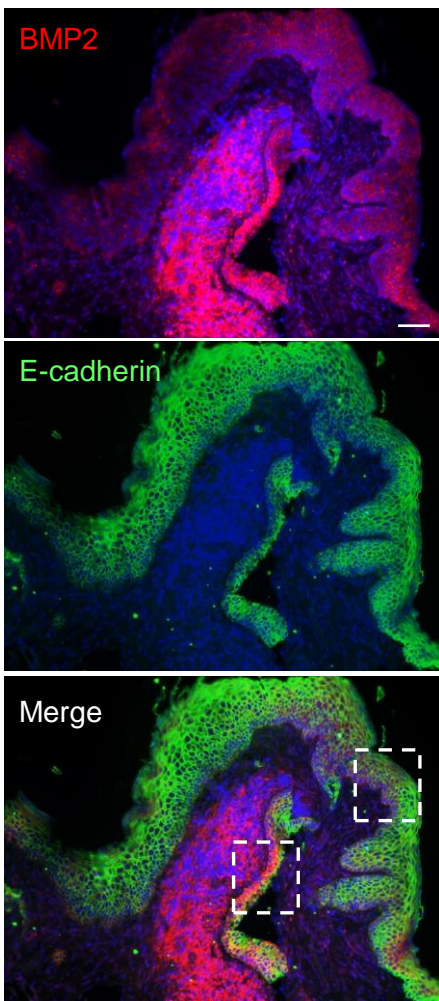

Magnified merge

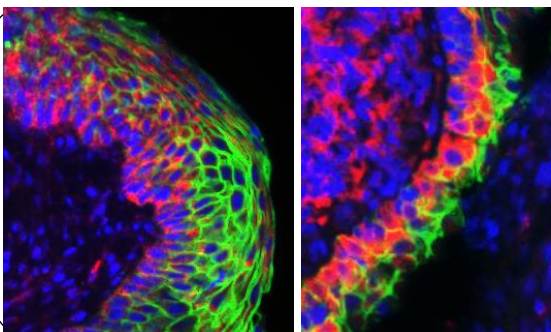

**Supplementary Figure 6. Detection of BMP2 on patient-derived biopsies. (a-b)** Immunofluorescent images showing BMP2 tissue expression and distribution on paraffin sections from two TO cases. E-Cadherin was stained to locate epithelial compartment in biopsies. Magnified areas were highlighted in white dotted boxes and displayed in separate images. Scale bar, 100 $\mu$ m. **(c)** Quantification of BMP2 expression on tracheobronchial biopsy sections based on immunofluorescence results (non-TO n=3, TO n=3 biologically independent experiments). Results were shown as mean  $\pm$  SD and statistical analysis was performed using two-tailed Student's t-test. P value is indicated to show statistical significance. Source data are provided as a Source Data file.

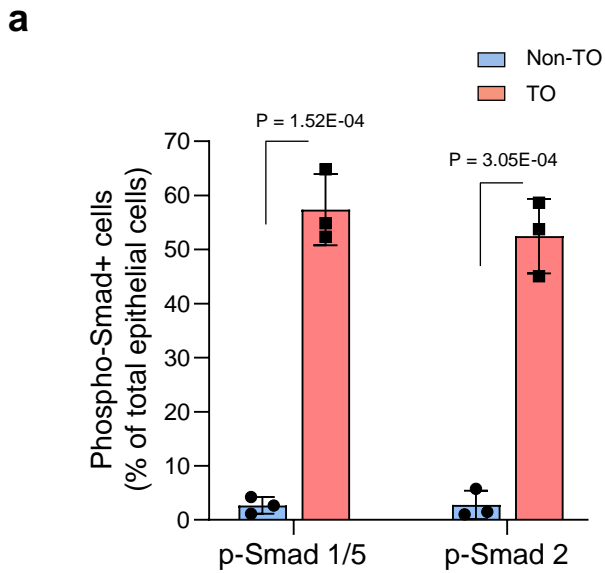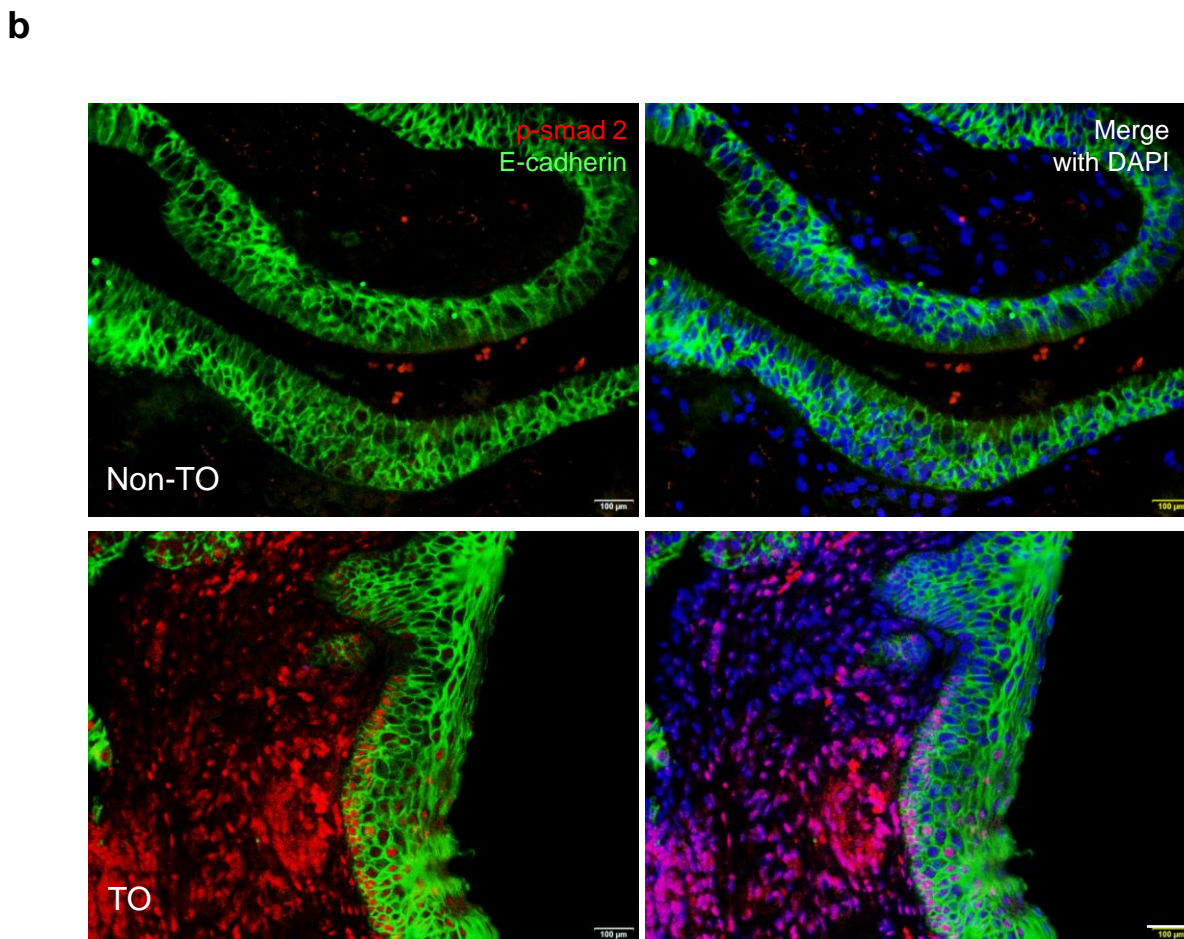

**Supplementary Figure 7. Detection of phosphorylated SMAD on patient-derived biopsies. (a)** Quantification of p-Smad2 and p-Smad1/5 in tissue epithelia based on immunofluorescence results (non-TO n=3, TO n=3 biologically independent experiments). Results were expressed as mean  $\pm$  SD, and p values are indicated to show statistical significance based on two-tailed Student's t-tests. **(b)** Representative co-staining images showing p-Smad2 and E-Cadherin expression on patient biopsies that were proceeded with quantification analysis in (a). Scale bar, 50 $\mu$ m. Source data are provided as a Source Data file.

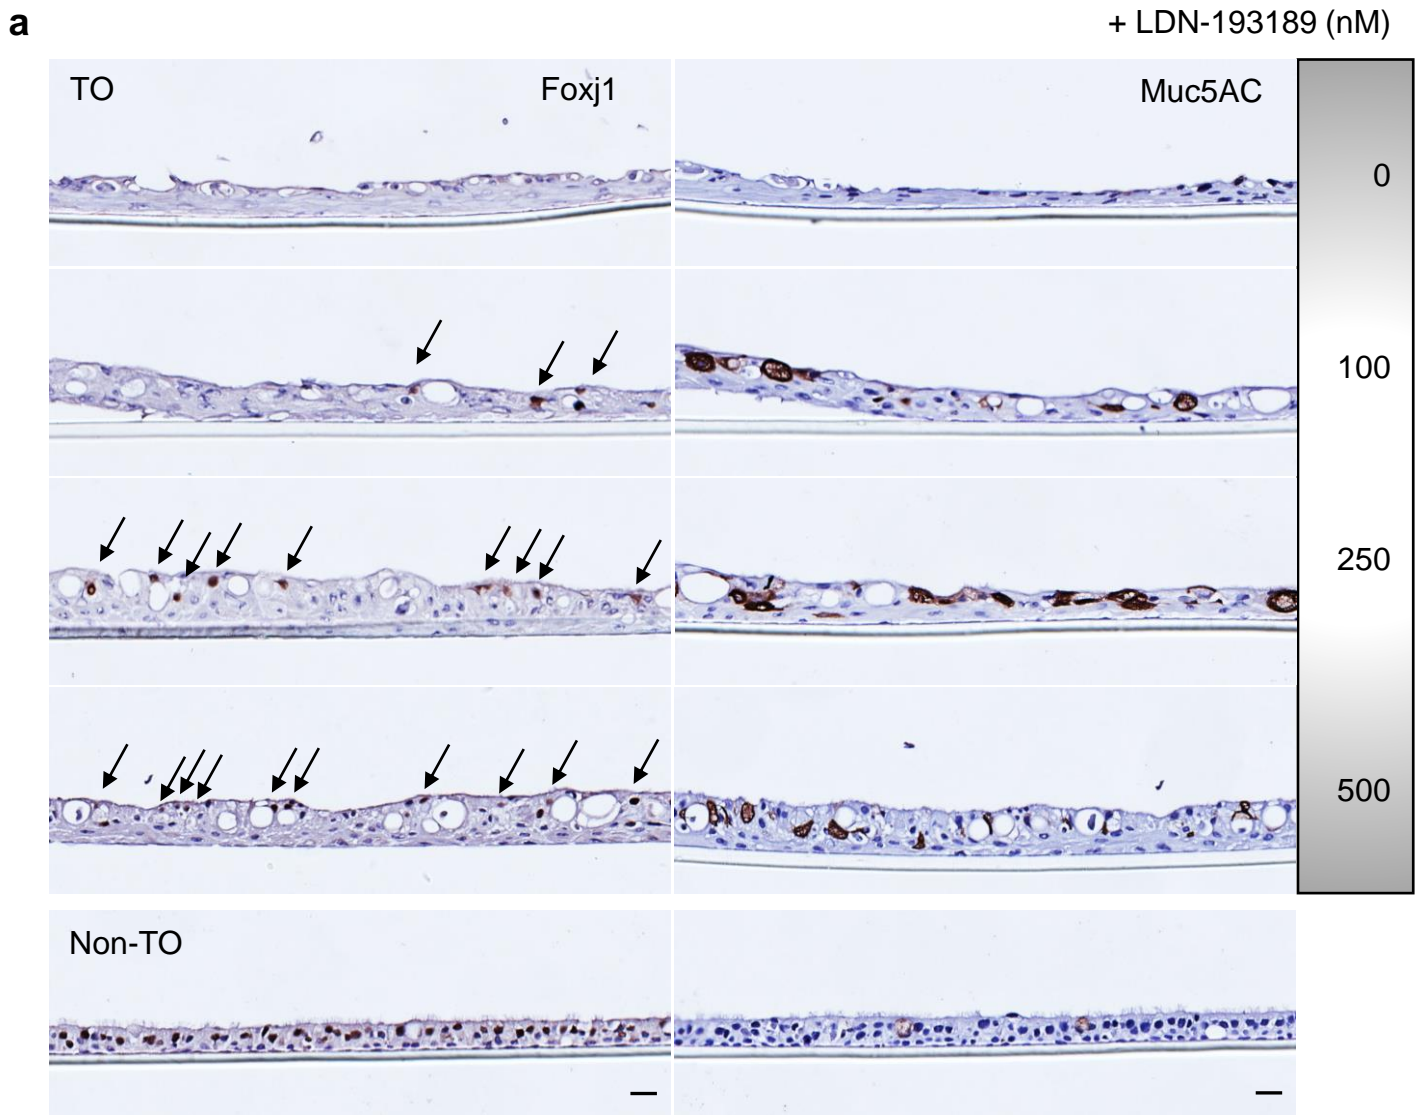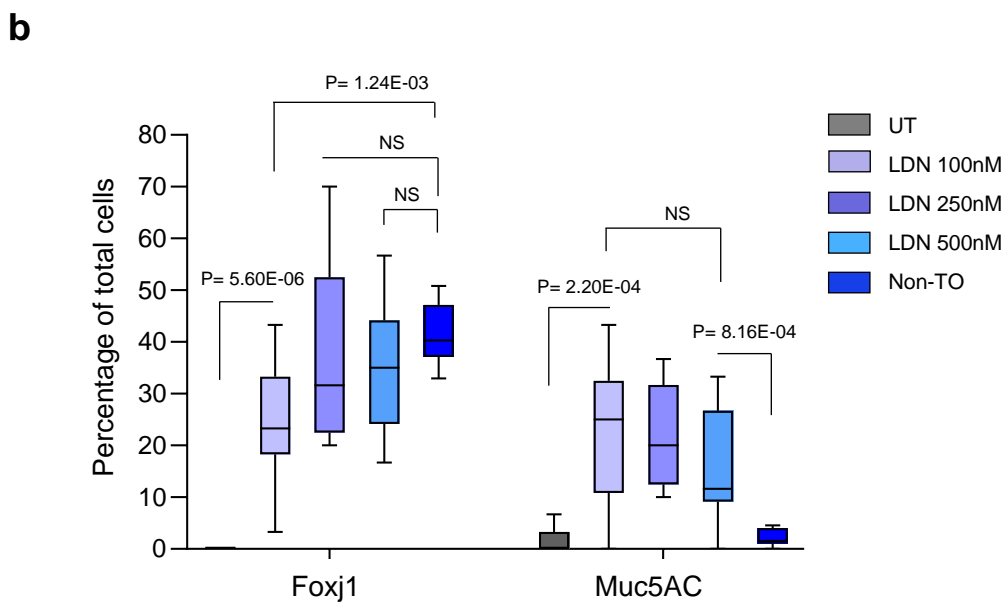

**Supplementary Figure 8. Effect of BMP inhibitor LDN-193189 on TO-basal cell differentiation.**

**(a)** TO-derived basal cells were treated with LDN-193189 at concentrations ranging between 100-500nM since Day 0 of ALI differentiation. Day20 structures were fixed to proceed with paraffin sectioning and immunohistochemical staining for mucociliary markers Foxj1 and Muc5AC. ALIs of TO-derived and non-TO basal cells without inhibitor treatment were examined as controls. Foxj1+ cells were highlighted by black arrows on TO-ALI sections. Scale bar, 20 $\mu$ m. **(b)** Quantification of ciliated (Foxj1+) and goblet (Muc5AC+) cell frequencies on TO basal cell-derived ALIs. UT (untreated TO-ALI) and non-TO basal cell-derived ALI were examined as controls. Ten sections from 3 independent experiments were counted per group. Boxes denote 25th and 75th percentile, lines denote median and whiskers min-max. P values are indicated to show statistical significance (<sup>NS</sup> p > 0.05) based on two-tailed Student's t-tests. Source data are provided as a Source Data file.

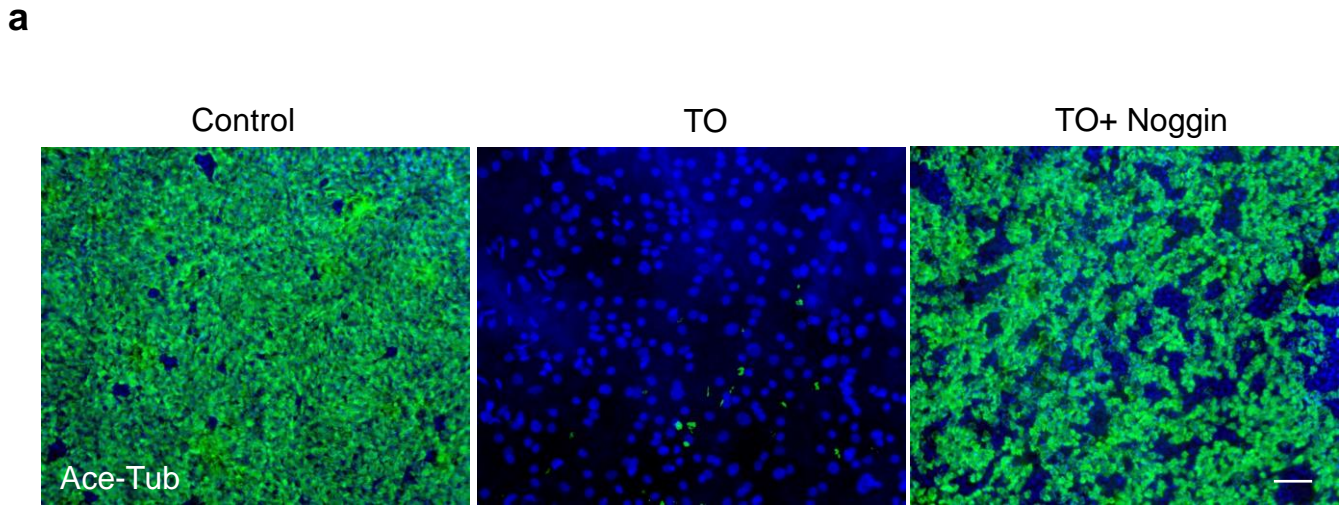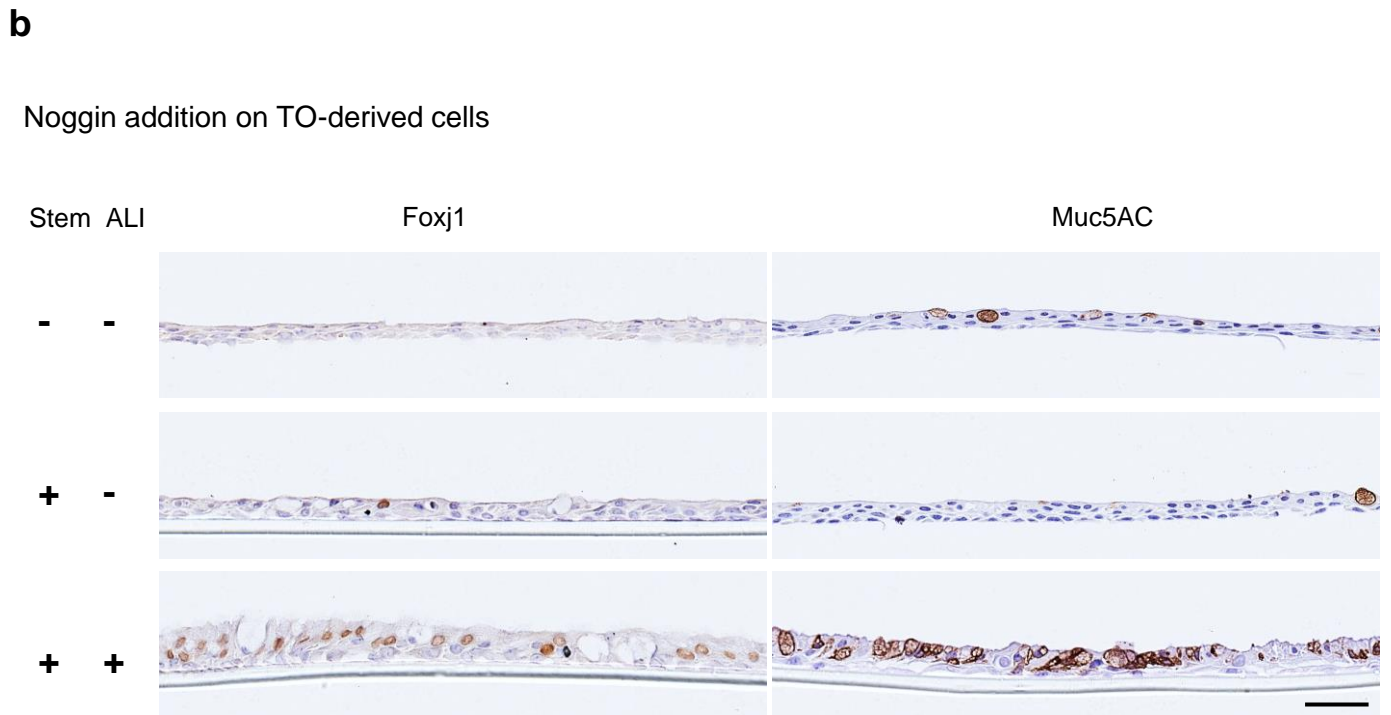

**Supplementary Figure 9. Effect of BMP antagonist Noggin on TO-basal cell differentiation. (a)** Representative ALI top-view images showing mucociliary differentiation of TO-derived basal cells under Noggin (200ng/ml) treatment since Day 0. TO-ALI without Noggin treatment and non-TO control ALI were examined in parallel. Day 20 structures were fixed to proceed with immunofluorescent staining (n=3 biologically independent experiments). Scale bar, 50 $\mu$ m. **(b)** An immunohistochemical comparison of Noggin on TO-TBBCs throughout ALI differentiation and Noggin withdrawal (n=2 biologically independent experiments). Differentiation efficiency was examined by Foxj1 and Muc5AC staining. Scale bar, 50 $\mu$ m.

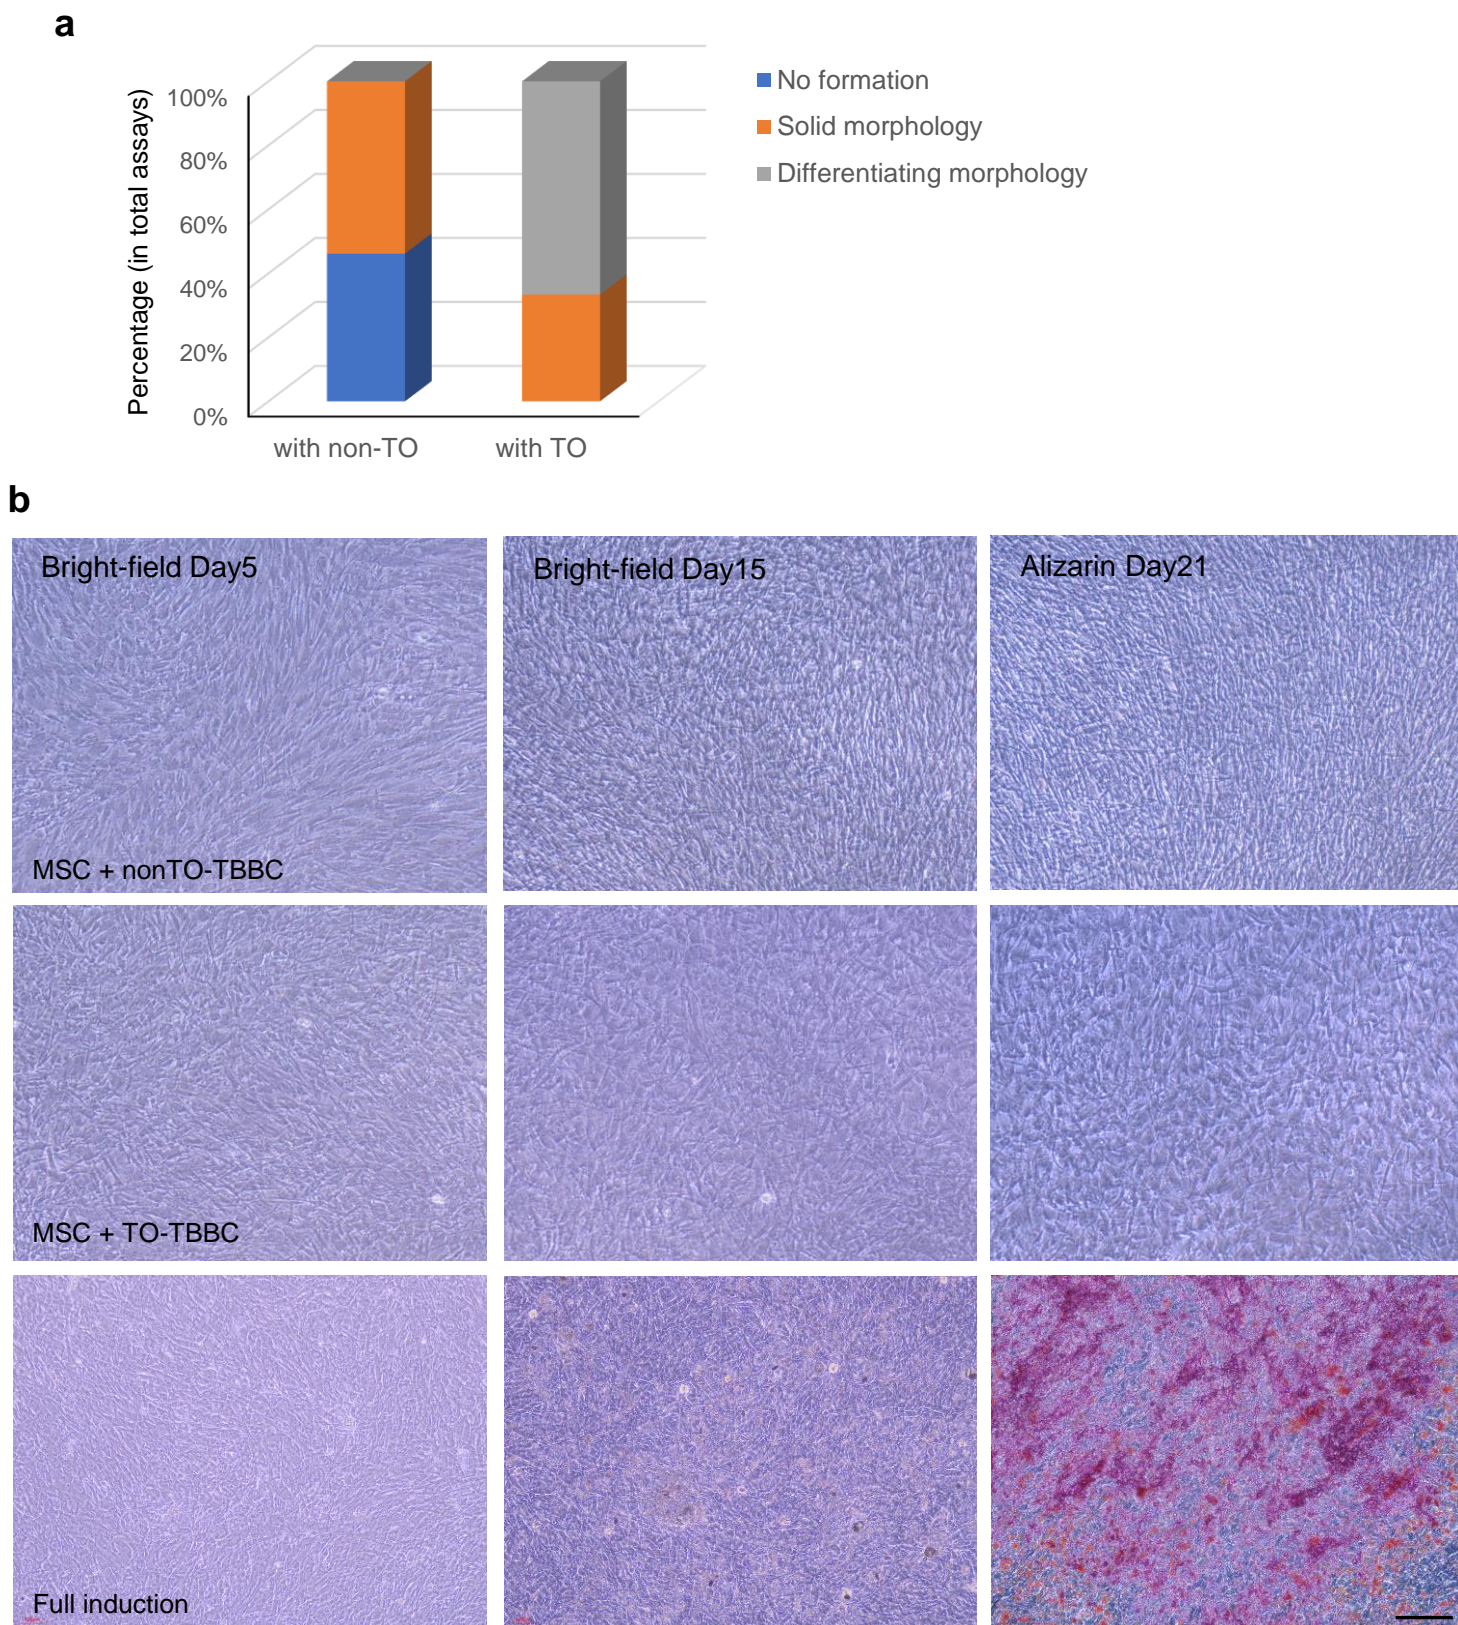

**Supplementary Figure 10. TBBC-MSc in vitro co-culture assays.** (a) A quantitative summary of MSC spheroid formation and differentiation based on observations from chondrogenic-lineage co-culture assays. Y-axis, percentage of total MSC pellets set for co-culture (non-TO n=13, TO n=7). Results were reached from two independent experiments involving a use of 3 non-TO cases and 2 TO-severe cases in examination. (b) A comparison of MSC osteogenic differentiation under co-culture conditions with non-TO controls and with TO-TBBCs derived ALI epithelia. MSCs undergone standard differentiation via full induction was examined in parallel. Calcium deposit was examined by Alizarin Red S Staining. Scale bar, 200 $\mu$ m. Independent experiments n=2 were performed for examination. Source data are provided as a Source Data file.

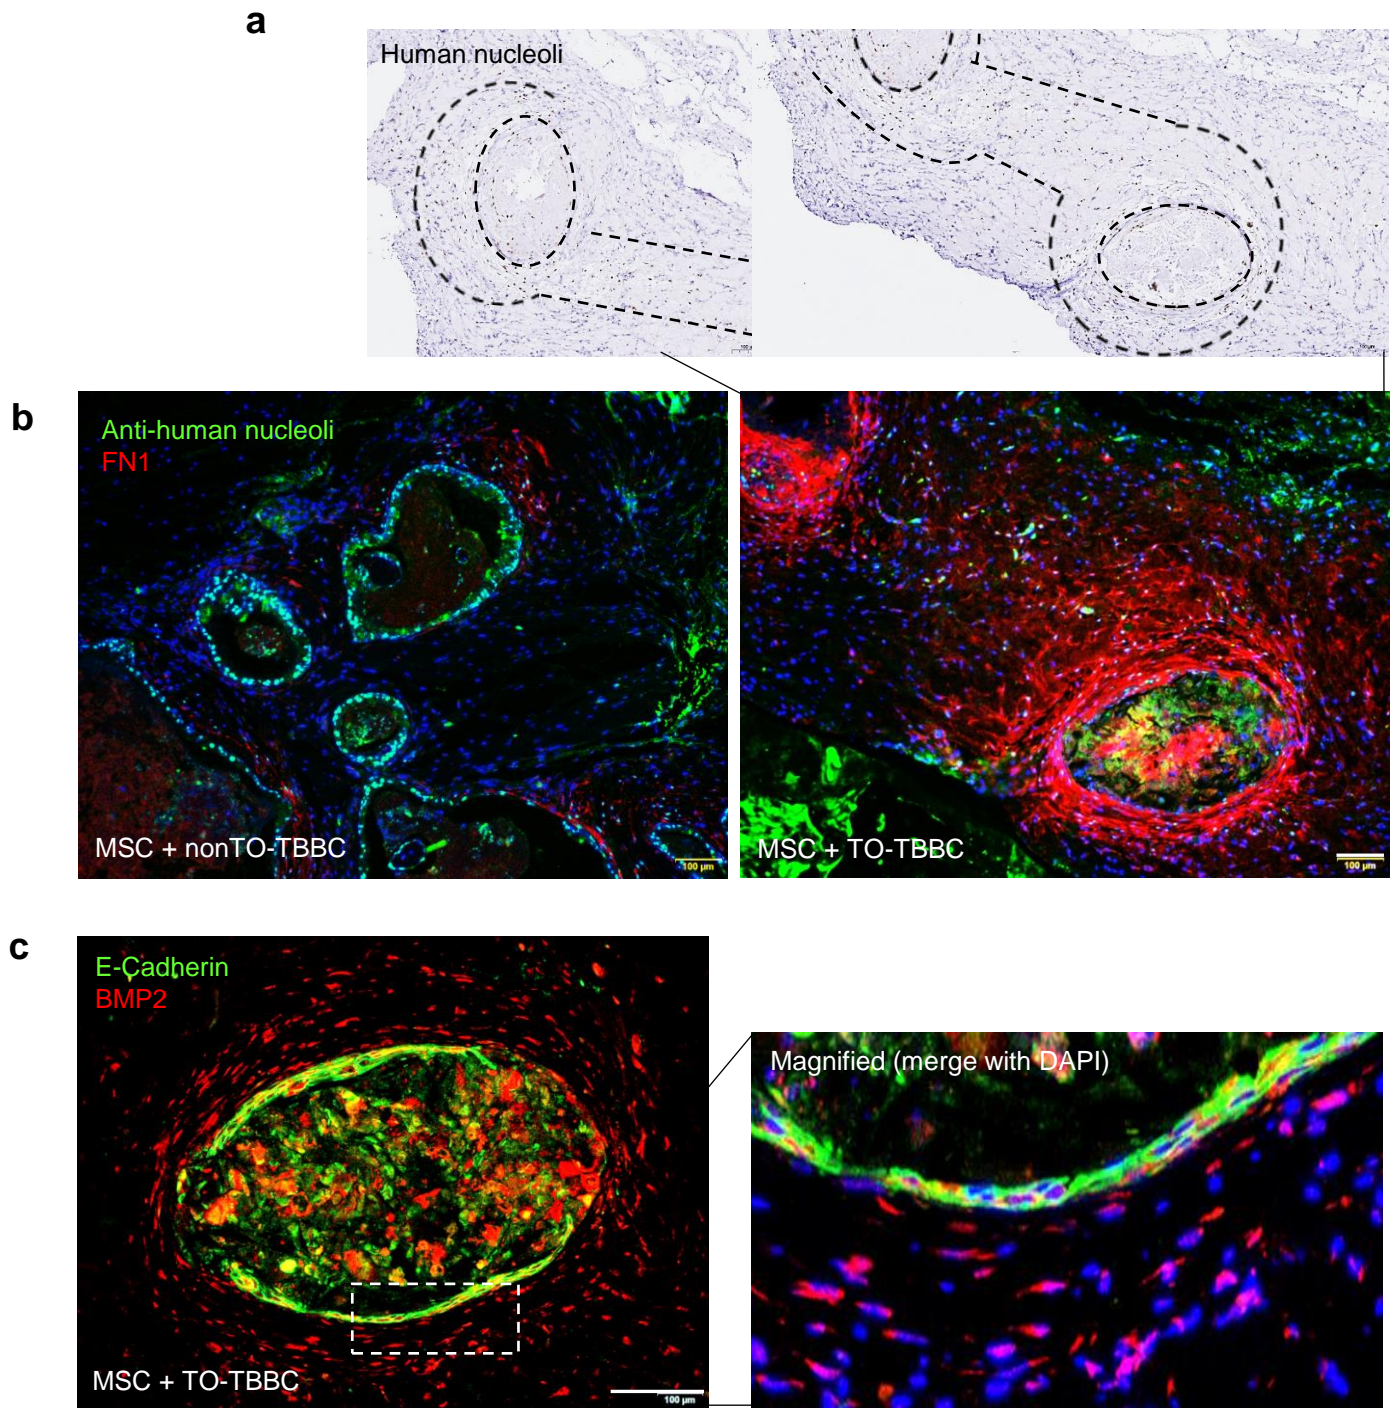

**Supplementary Figure 11. TBBC-MSc in vivo co-culture assays.** (a) Distribution of transplanted cells in xenografts was illustrated by human nucleoli staining, and circled in the pictures. (b) Immunofluorescent images showing FN1 expression in xenografts resulted from MSC growths when co-cultured with non-TO control cells or with TO-TBBCs. Scale bar, 100 $\mu$ m. (c) The serial sections of the same sets of xenografts were proceeded with BMP2 and E-Cadherin co-staining. Representative magnified image showing the area highlighted in white box. Scale bar, 100 $\mu$ m. Independent experiments n=2 were performed for examination. Source data are provided as a Source Data file.



**a** Aggregated MSC + nonTO-TBBC

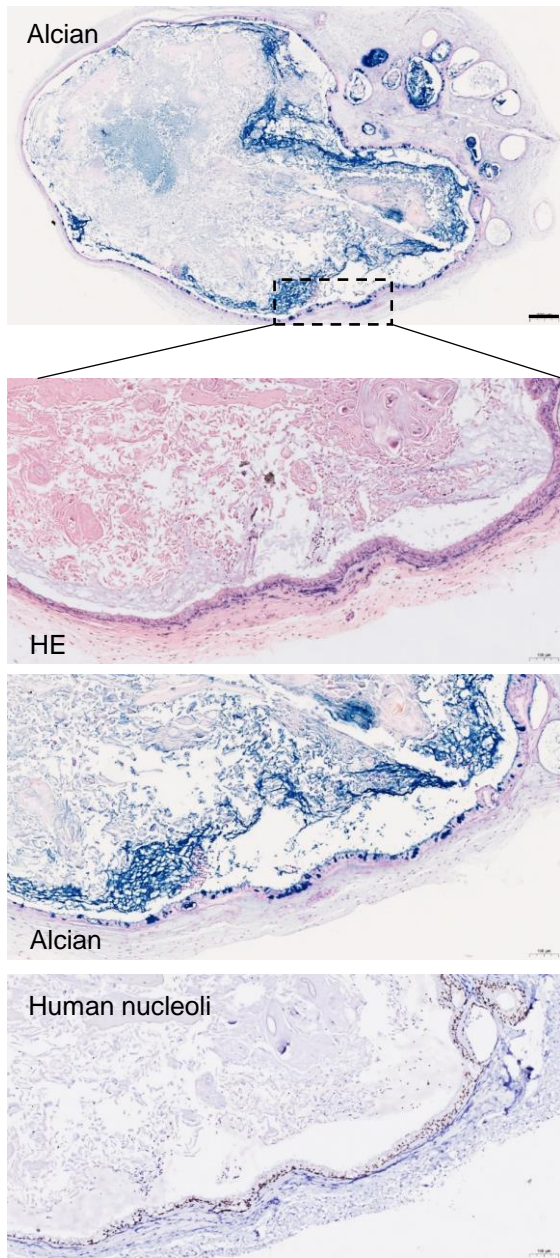

**b** TO-TBBC transplanted w/o MSC

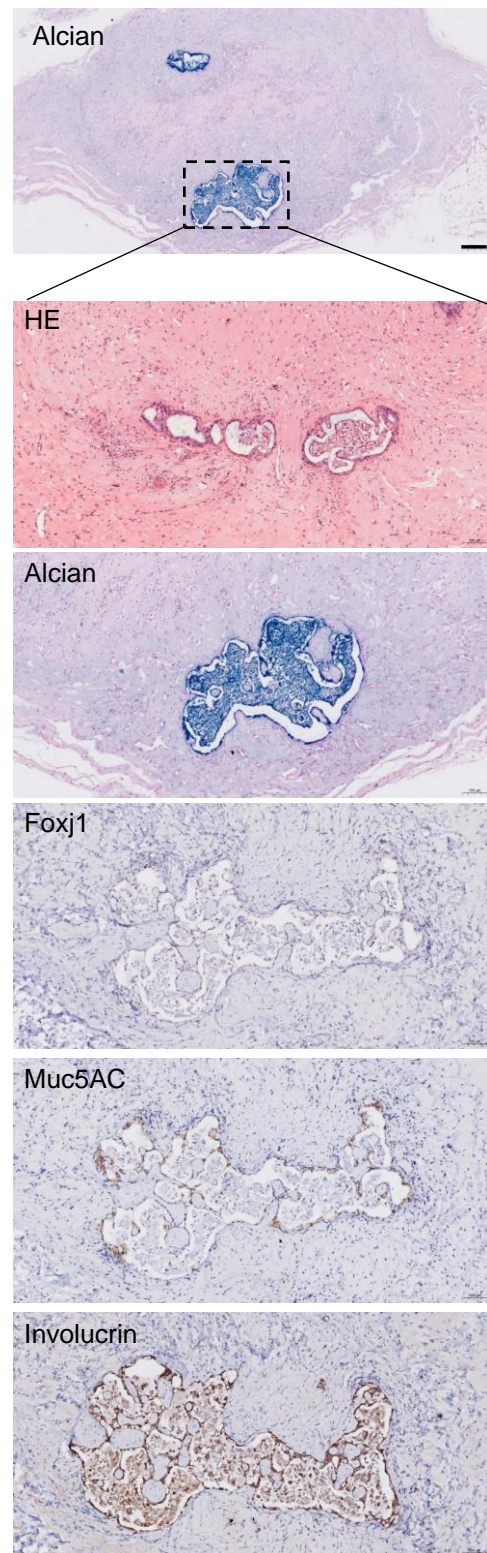

**c**

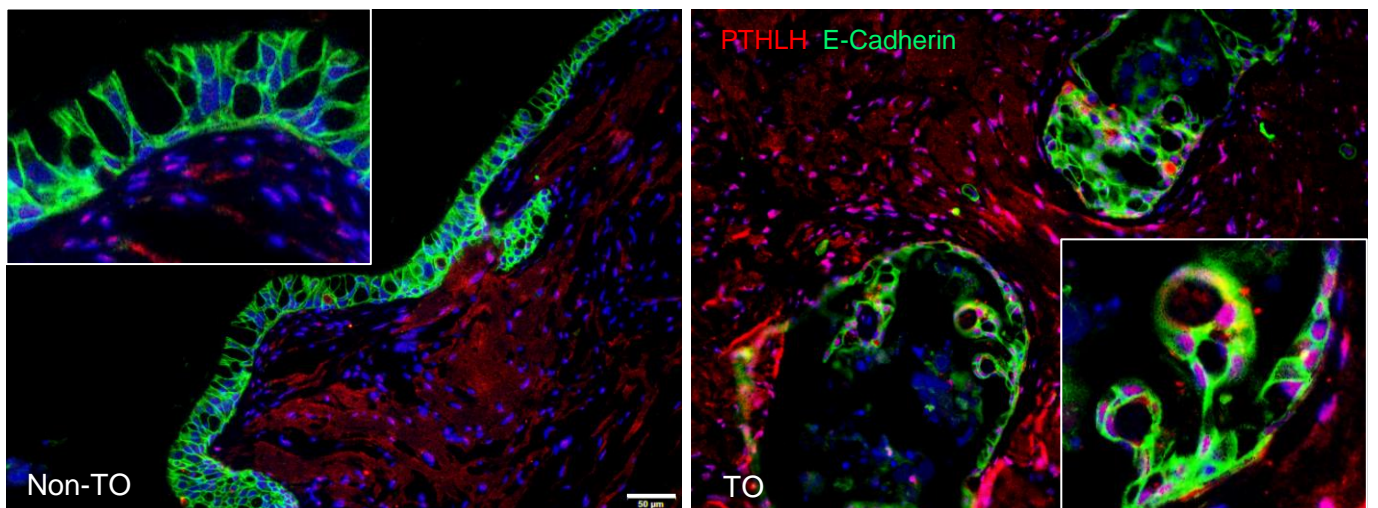

**Supplementary Figure 12. Controls for co-culture assay in vivo and PTHLH expression in non-TO and TO xenografts.** (a) Paraffin sections of 4-week xenografts formed by aggregated MSC spheroid + non-TO TBBC co-transplantation assay were examined by HE and Alcian blue staining. Human nucleoli distribution was confirmed by immunohistochemistry. Scale bar, 200 $\mu$ m. (b) Four-week xenografts formed by TO-TBBCs in the absence of co-transplanted MSC were examined by HE, Alcian blue and immunohistochemical staining for cell-type specific markers. Scale bar, 200 $\mu$ m. (c) Representative immunofluorescent images showing E-Cadherin and PTHLH co-staining on xeno-sections acquired from nonTO-TBBC and TO-TBBC transplantations. Independent experiments n= 2 were performed for examination. Scale bar, 50 $\mu$ m.

PM phenotype: Normal-like

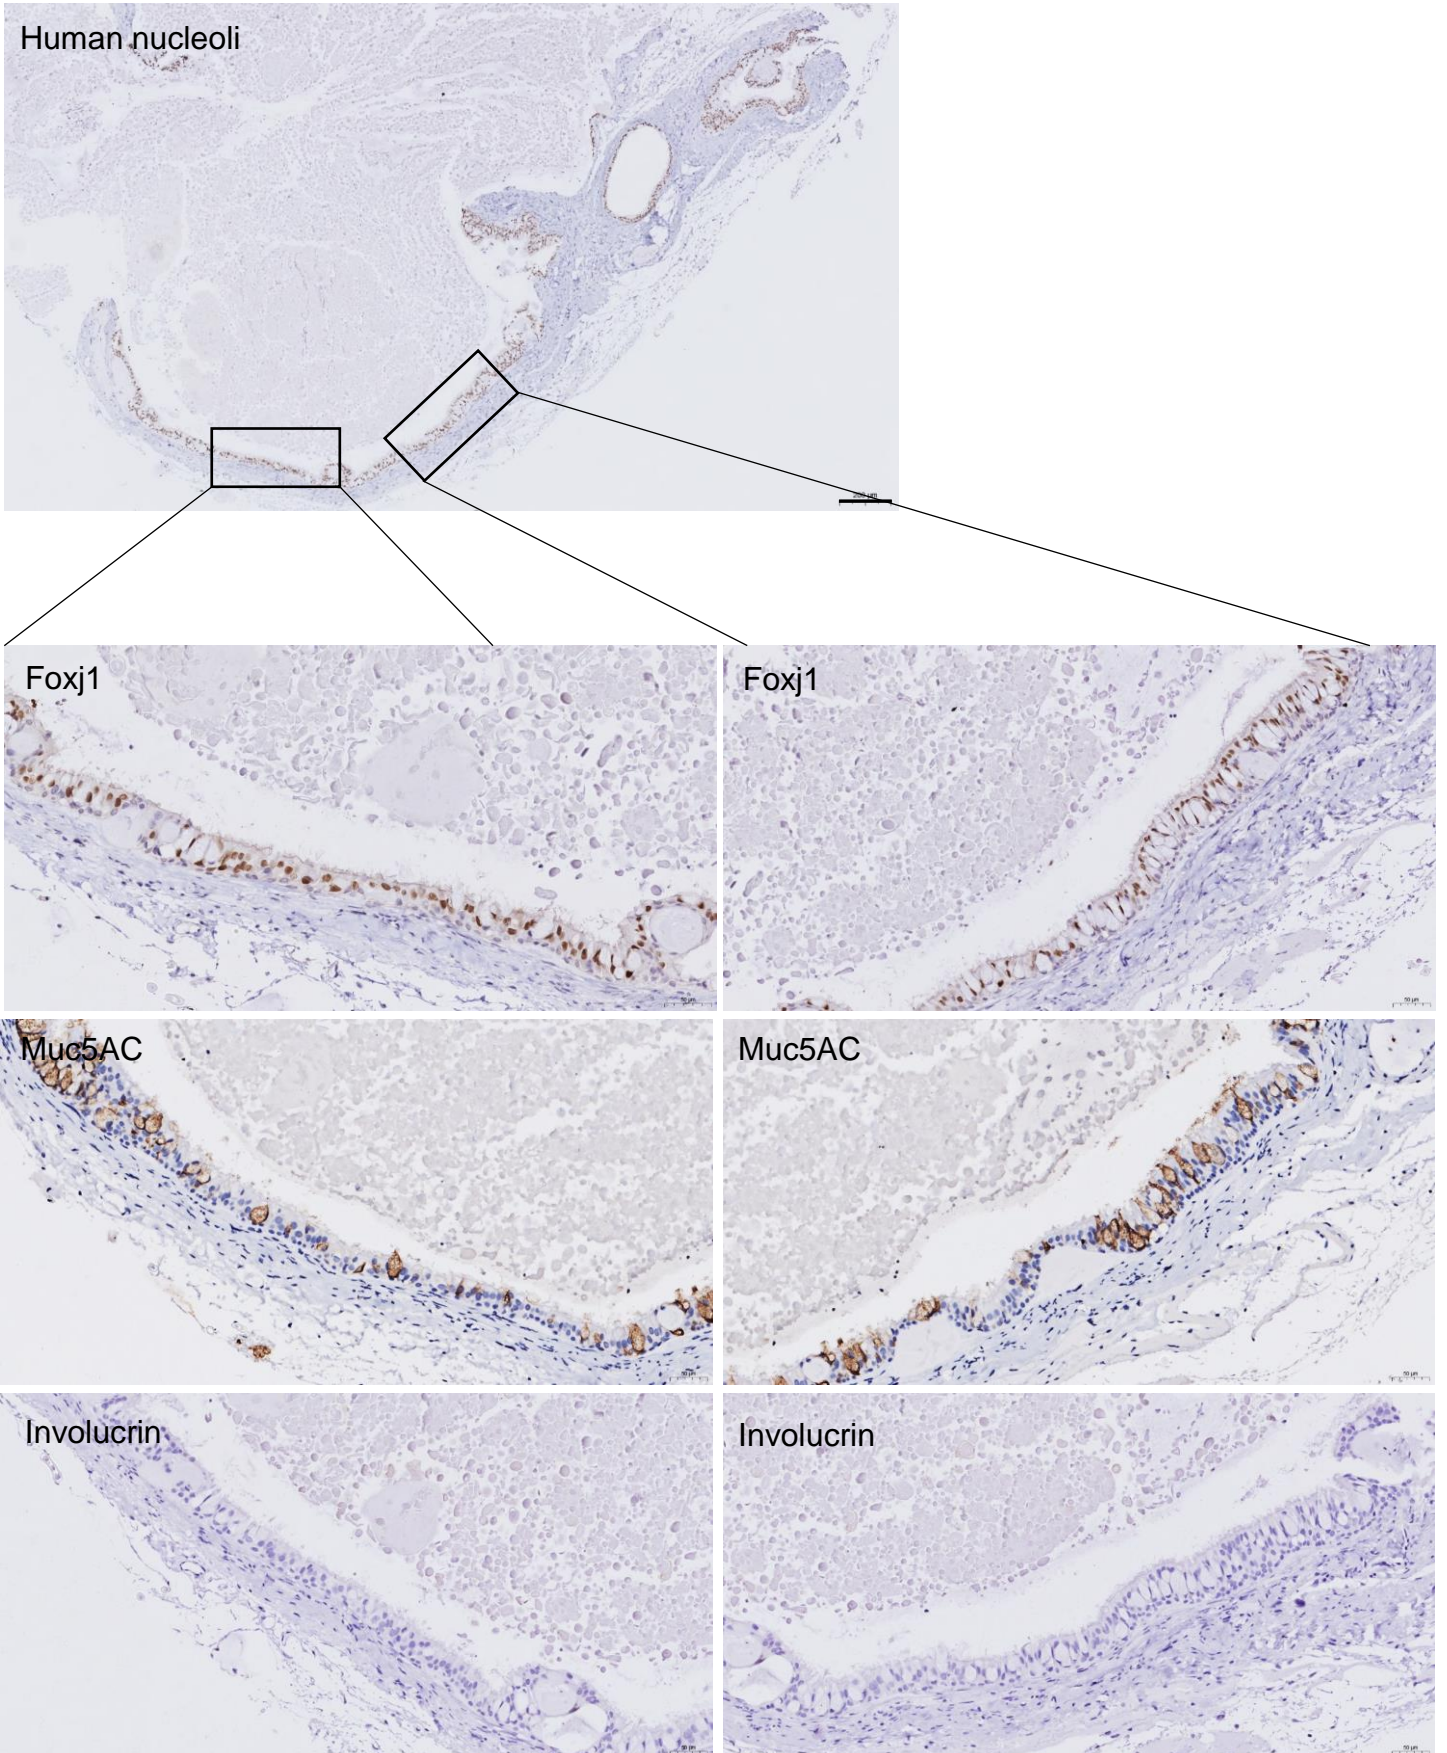

Supplementary Figure 14.

**PM phenotype: Goblet metaplasia**

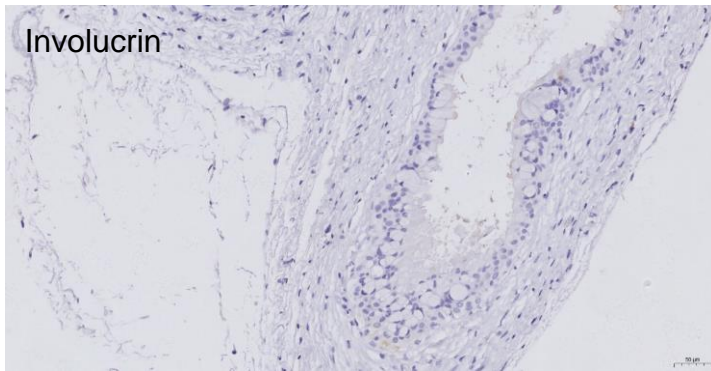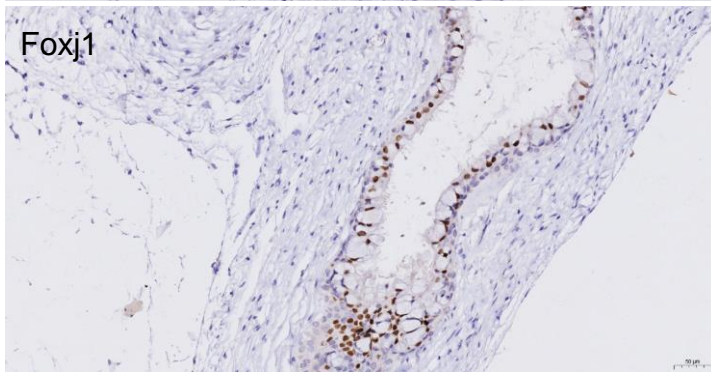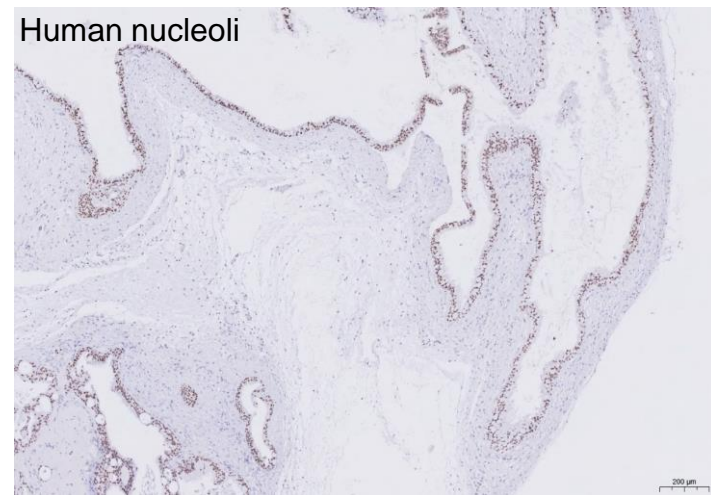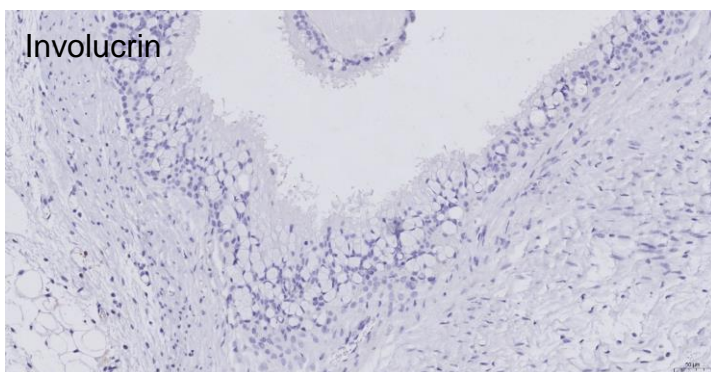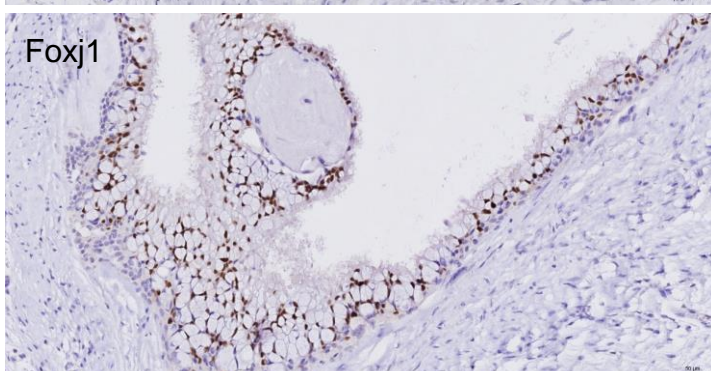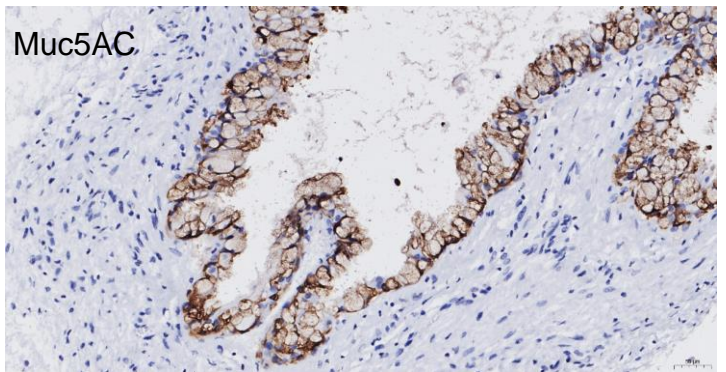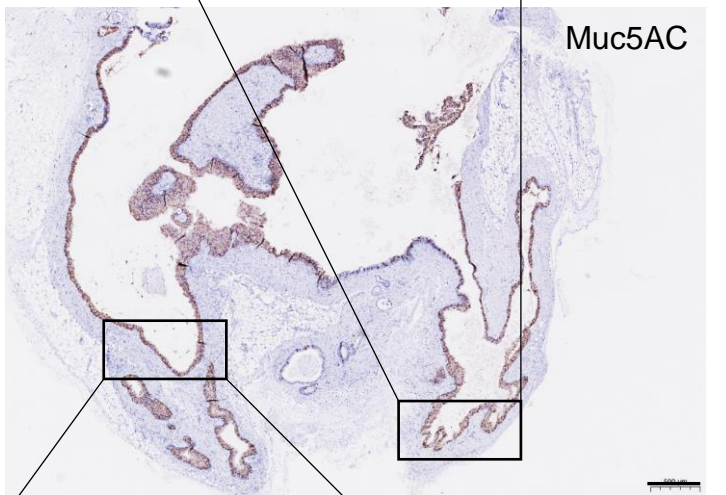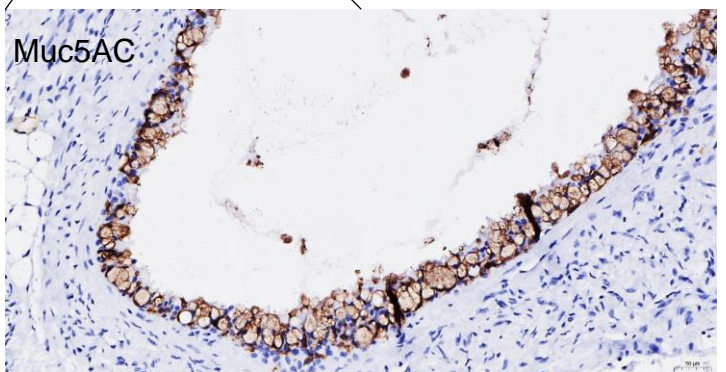

**PM phenotype: Cilium dysplasia**

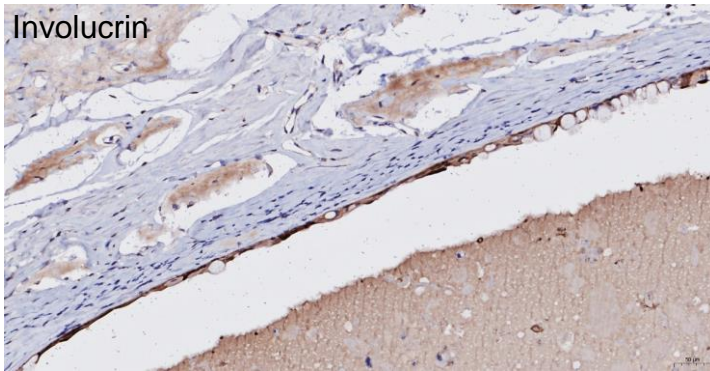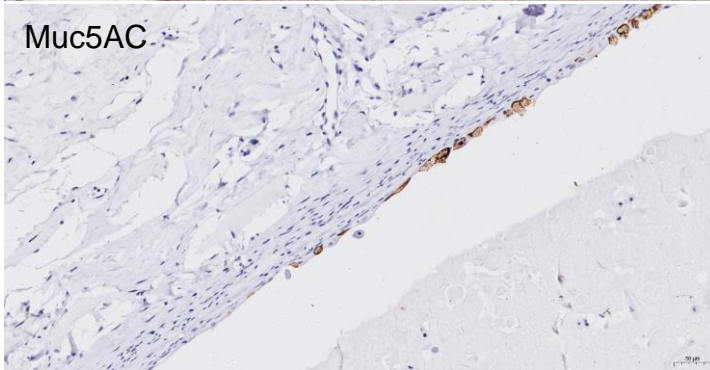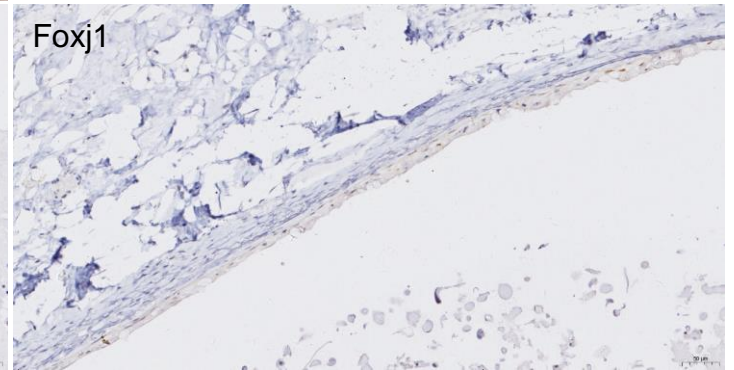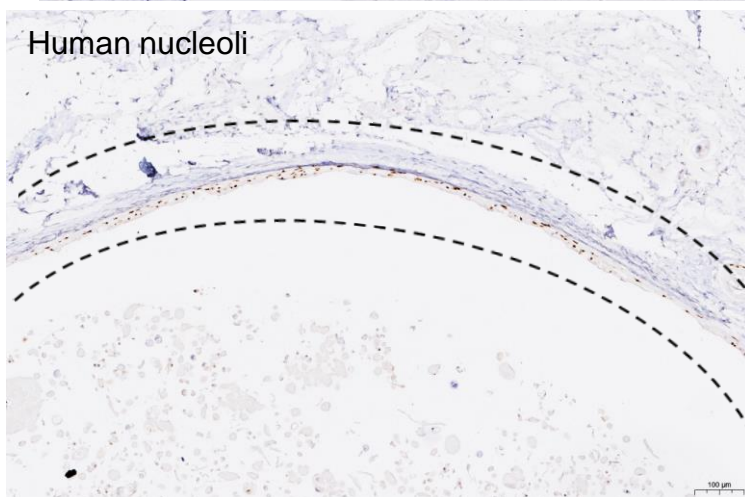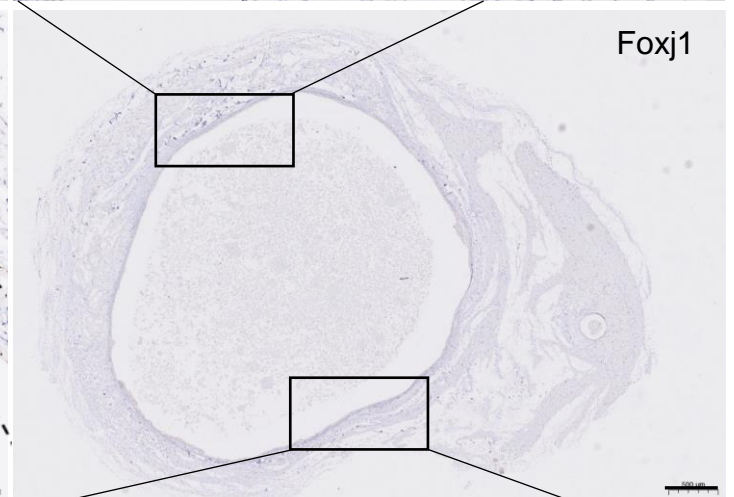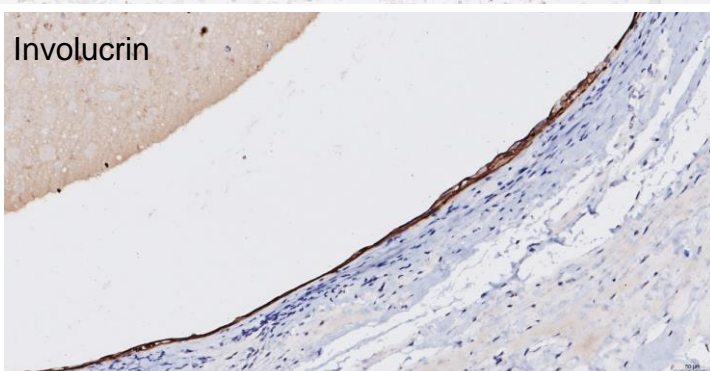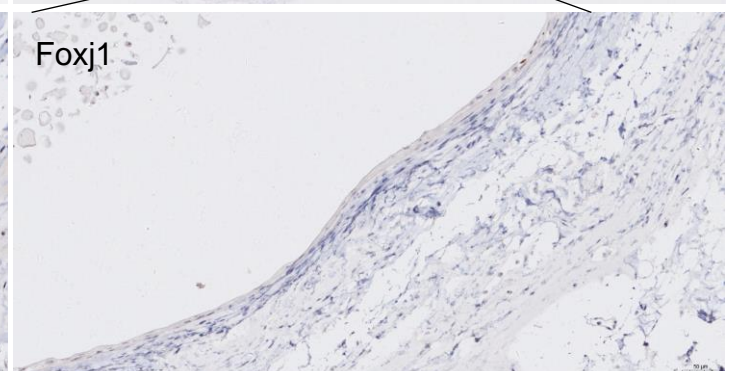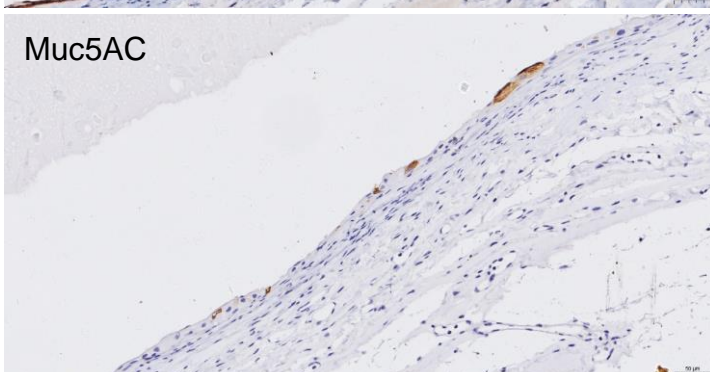

**Supplementary Figure 13-15. In vivo differentiation of patient-matched TBBCs isolated from the normal-looking regions of patients' trachea-bronchi.** Patient-matched (PM) TBBCs showed distinct differentiation potentials, referring to normal-like, goblet metaplasia and cilium dysplasia phenotypes observed on xenografts, which were collected at Week 4 post subcutaneous transplantation. Representative full-scale immunohistochemical images showing cell type frequencies using antibodies against Foxj1, Muc5AC and Involucrin (n=2 independent experiments). Human nucleoli antibody was used to confirm the location and distribution of transplanted cells. Scale bar, 500µm.

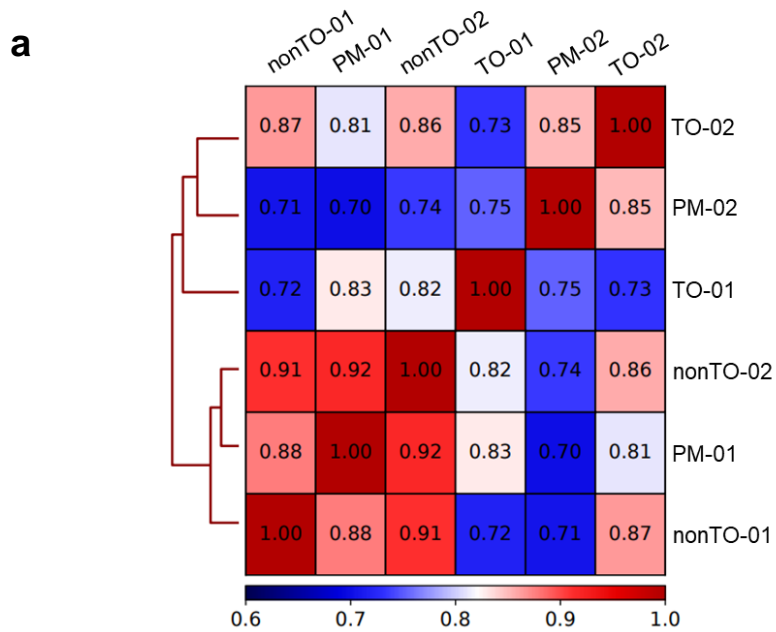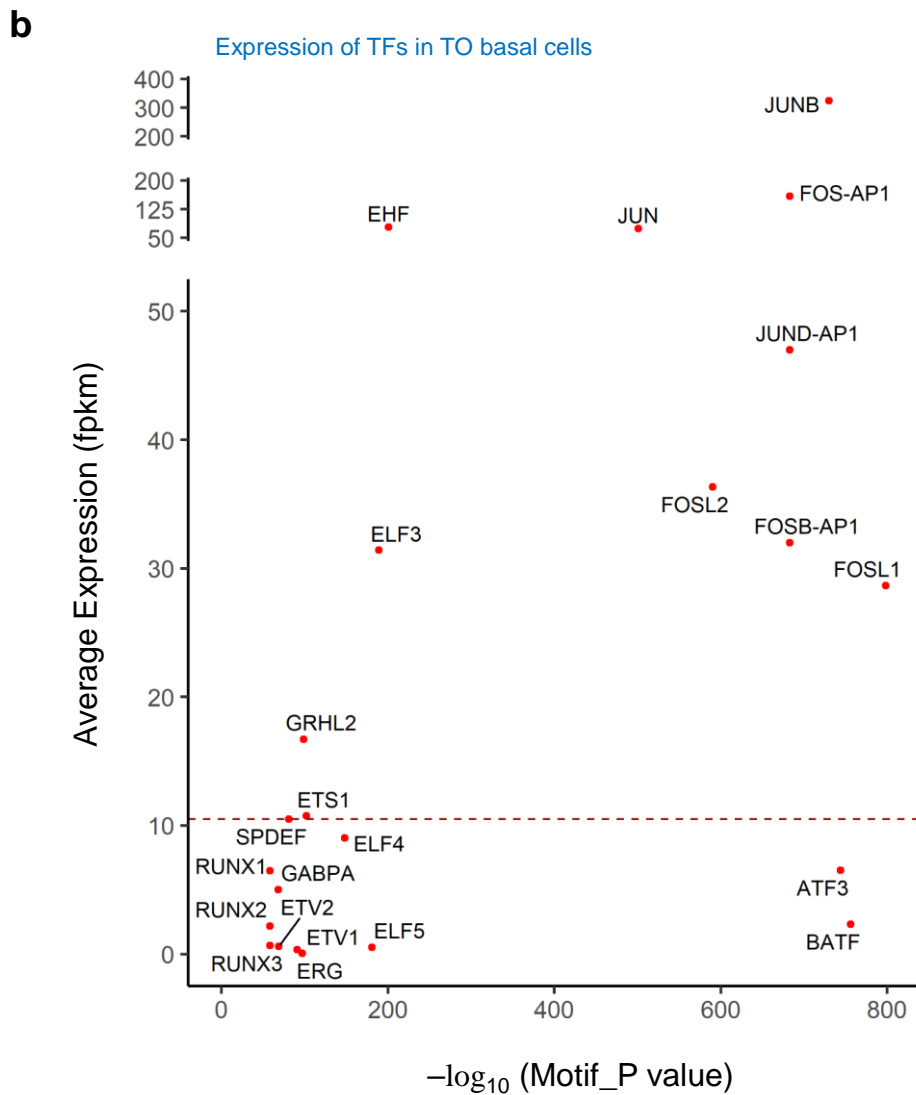

**Supplementary Figure 16. ATAC-Seq of patient-derived TBBCs and joint-analysis with RNA-Seq data. (a)** Pearson correlation result of ATAC-Seq data. **(b)** Correlation of motif enrichment with expression of corresponding transcription factors in TO-TBBCs. Red dotted line indicates the median value according to RNA-Seq data.

**a**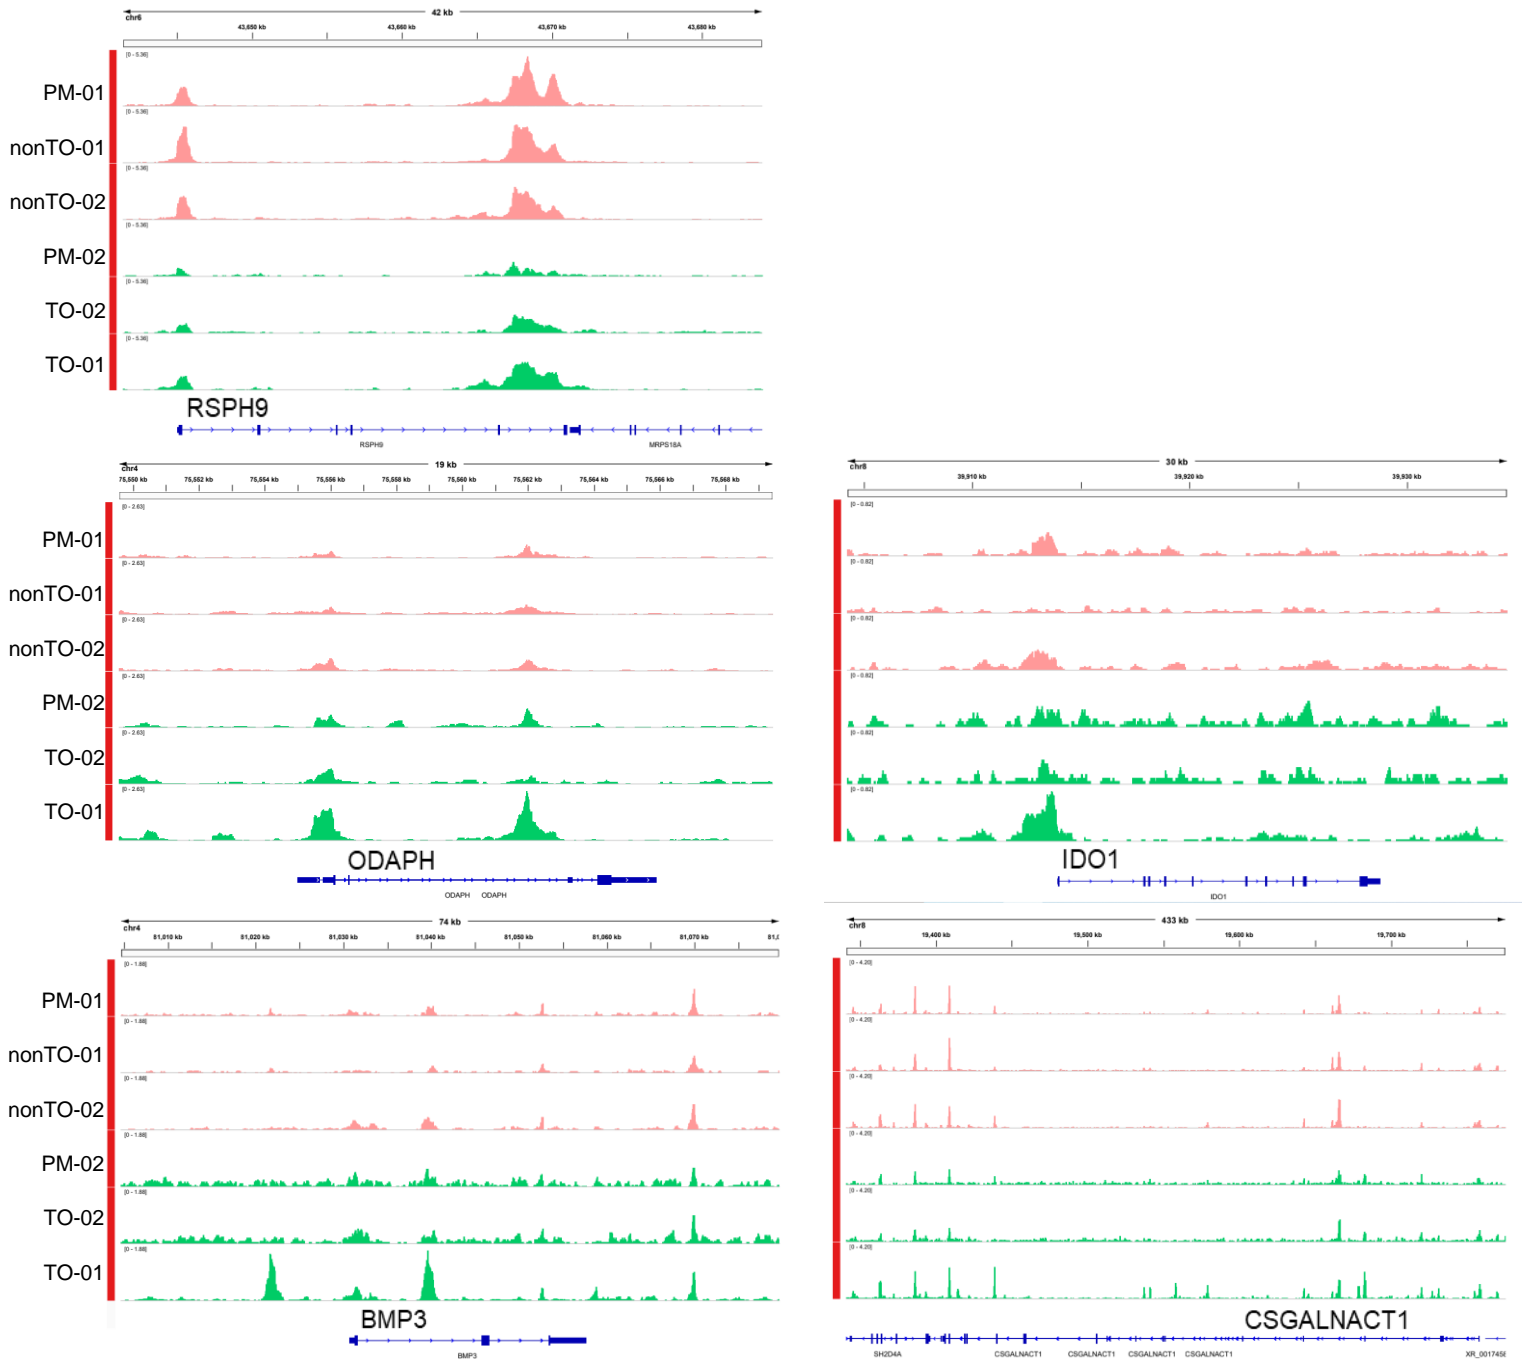**b**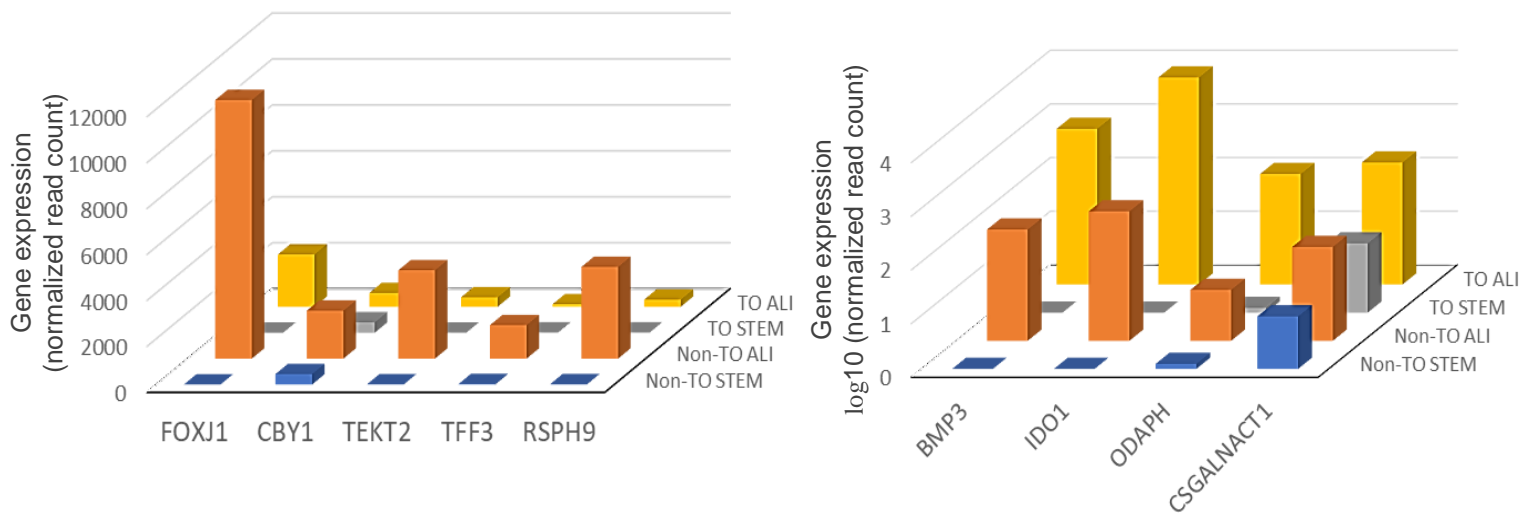



**Supplementary Figure 17. Status of chromatin accessibility and gene expression at key loci.**

**(a)** IGV graphs visualizing chromatin accessibility at key loci related to cartilage development, inflammation and ciliogenesis. Peak height is positively correlated to accessibility. Genome scale is included and Y-axis is consistent for all loci. **(b)** Histogram showing transcriptional levels of selected genes between control and TO groups before and after differentiation, corresponding to IGV results shown in this figure and Fig. 7e.











**Supplementary Table 2.** List of genes with increased chromatin accessibility at promoter region and their expressions at stem state and differentiated state

| Gene expression linked to peaks up in TO | Gene ID    | Peak Annotation                   | Distance to TSS | p-value  | Fold Change (log2) | TO vs. Non-TO |
|------------------------------------------|------------|-----------------------------------|-----------------|----------|--------------------|---------------|
| <b>Stem state</b>                        | FGF10      | promoter-TSS (ENST00000264664.4)  | -279            | 0.006825 | 6.49               | up            |
|                                          | ITGAX      | promoter-TSS (ENST00000562522.2)  | -291            | 0.011157 | 4.35               | up            |
|                                          | KLK12      | promoter-TSS (ENST00000250351.4)  | -53             | 0.001547 | 2.26               | up            |
|                                          | RUNX1T1    | promoter-TSS (ENST00000614812.4)  | -12             | 0.019282 | 5.10               | up            |
|                                          | ARHGAP24   | promoter-TSS (ENST00000264343.4)  | -906            | 0.005496 | -1.52              | down          |
|                                          | GRAMD1B    | promoter-TSS (ENST00000646146.1)  | -346            | 0.009418 | -3.50              | down          |
|                                          | IPCEF1     | promoter-TSS (ENST00000367220.8)  | -25             | 0.027998 | -1.88              | down          |
|                                          | RARB       | promoter-TSS (ENST00000458646.1)  | -76             | 0.020646 | -3.20              | down          |
|                                          | SEC16B     | promoter-TSS (ENST00000308284.10) | -60             | 0.03691  | -1.12              | down          |
| <b>Differentiated state</b>              | ADAMTS5    | promoter-TSS (ENST00000284987.5)  | -899            | 0.000927 | 6.34               | up            |
|                                          | AGMO       | promoter-TSS (ENST00000342526.7)  | 11              | 0.015141 | 3.33               | up            |
|                                          | ATP6V0D2   | promoter-TSS (ENST00000285393.3)  | 49              | 0.000745 | 5.49               | up            |
|                                          | C4orf19    | promoter-TSS (ENST00000284437.6)  | 59              | 0.023027 | 1.28               | up            |
|                                          | CD69       | promoter-TSS (ENST00000228434.7)  | -302            | 0.006832 | 5.20               | up            |
|                                          | COL5A2     | promoter-TSS (ENST00000374866.8)  | -612            | 5.35E-07 | 3.35               | up            |
|                                          | CSGALNACT1 | promoter-TSS (ENST00000332246.10) | 66              | 0.006357 | 1.75               | up            |
|                                          | GABRP      | promoter-TSS (ENST00000518525.5)  | -55             | 1.28E-11 | 1.41               | up            |
|                                          | GNG4       | promoter-TSS (ENST00000484517.2)  | -505            | 0.02777  | 2.29               | up            |
|                                          | IDO1       | promoter-TSS (ENST00000518237.5)  | -201            | 1.34E-05 | 4.80               | up            |
|                                          | MICAL2     | promoter-TSS (ENST00000527546.5)  | -478            | 6.05E-05 | 1.65               | up            |
|                                          | ODAPH      | promoter-TSS (ENST00000616557.1)  | -209            | 0.000544 | 3.74               | up            |
|                                          | PITPNM2    | promoter-TSS (ENST00000542749.5)  | -284            | 0.000982 | 1.18               | up            |
|                                          | PTPN22     | promoter-TSS (ENST00000525799.1)  | -159            | 0.03057  | 2.51               | up            |
|                                          | SATB2      | promoter-TSS (ENST00000457245.5)  | -242            | 0.026141 | 1.53               | up            |
|                                          | SH2D1B     | promoter-TSS (ENST00000367929.2)  | 23              | 0.007382 | 3.07               | up            |
|                                          | TENM2      | promoter-TSS (ENST00000518659.5)  | -385            | 1.3E-07  | 1.99               | up            |
|                                          | TNFSF11    | promoter-TSS (ENST00000358545.6)  | -383            | 0.006503 | 2.01               | up            |
|                                          | BTNL8      | promoter-TSS (ENST00000410920.1)  | 112             | 0.026586 | -3.69              | down          |
|                                          | CFAP58     | promoter-TSS (ENST00000369703.1)  | 50              | 0.002    | -2.39              | down          |
|                                          | FABP6      | promoter-TSS (ENST00000402432.3)  | -590            | 2.12E-06 | -4.35              | down          |
|                                          | KLK14      | promoter-TSS (ENST00000650543.1)  | -348            | 0.016259 | -2.31              | down          |
|                                          | LYZ        | promoter-TSS (ENST00000549690.1)  | 56              | 0.005913 | -1.48              | down          |
|                                          | MS4A8      | promoter-TSS (ENST00000300226.6)  | 100             | 0.00853  | -2.70              | down          |
|                                          | NEK10      | promoter-TSS (ENST00000383770.4)  | -458, -640      | 0.041795 | -1.76              | down          |
|                                          | PACRG      | promoter-TSS (ENST00000611387.1)  | -900            | 0.003251 | -2.72              | down          |
|                                          | PPCDC      | promoter-TSS (ENST00000563393.1)  | 98              | 0.039533 | -1.66              | down          |
|                                          | RP1        | promoter-TSS (ENST00000637698.1)  | 94              | 0.036107 | -1.83              | down          |
|                                          | SMIM6      | promoter-TSS (ENST00000579469.1)  | -232            | 3.73E-06 | -4.29              | down          |
|                                          | TEKT4      | promoter-TSS (ENST00000295201.4)  | -443            | 0.001103 | -3.05              | down          |

**Supplementary Table 3.** List of genes with decreased chromatin accessibility at promoter region and their expressions at stem state and differentiation state

| Gene expression linked to peaks down in TO | Gene ID                          | Peak Annotation                   | Distance to TSS | p-value  | Fold Change (log2) | TO vs. Non-TO |
|--------------------------------------------|----------------------------------|-----------------------------------|-----------------|----------|--------------------|---------------|
| Stem state                                 | TNS1                             | promoter-TSS (ENST00000646520.1)  | -33             | 0.004181 | -1.62              | down          |
|                                            | BAIAP3                           | promoter-TSS (ENST00000628027.2)  | -18             | 0.015623 | -2.97              | down          |
|                                            | PAMR1                            | promoter-TSS (ENST00000621476.4)  | -191            | 1.23E-05 | -4.34              | down          |
|                                            | NFIX                             | promoter-TSS (ENST00000587760.5)  | -921            | 0.007613 | -1.47              | down          |
|                                            | APCDD1                           | promoter-TSS (ENST00000578882.1)  | -9              | 0.001803 | -2.70              | down          |
|                                            | ZFP3                             | promoter-TSS (ENST00000574352.1)  | 147             | 0.008388 | -1.77              | down          |
|                                            | ALOX15                           | promoter-TSS (ENST00000570836.5)  | -513            | 0.006552 | -5.64              | down          |
|                                            | ATP2A1                           | promoter-TSS (ENST00000561547.5)  | 55              | 0.021148 | -1.47              | down          |
|                                            | BMP4                             | promoter-TSS (ENST00000558984.1)  | -365            | 0.000296 | -2.90              | down          |
|                                            | NR4A1                            | promoter-TSS (ENST00000545748.5)  | -610            | 0.000262 | -2.67              | down          |
|                                            | SFTA3                            | promoter-TSS (ENST00000518529.6)  | -348            | 9.49E-05 | -4.93              | down          |
|                                            | NGFR                             | promoter-TSS (ENST00000504201.1)  | -780            | 1.81E-07 | -1.64              | down          |
|                                            | NKX2-1                           | promoter-TSS (ENST00000498187.6)  | 69              | 0.0355   | -5.39              | down          |
|                                            | FRMD5                            | promoter-TSS (ENST00000484674.5)  | 317             | 0.000449 | -3.37              | down          |
|                                            | MNX1                             | promoter-TSS (ENST00000480284.1)  | 120             | 0.003431 | -6.58              | down          |
|                                            | COL6A2                           | promoter-TSS (ENST00000454245.1)  | -82             | 0.044091 | -7.49              | down          |
|                                            | HCAR1                            | promoter-TSS (ENST00000432564.2)  | 5               | 0.001076 | -4.79              | down          |
|                                            | WNK2                             | promoter-TSS (ENST00000427277.6)  | -483            | 0.014241 | -2.31              | down          |
|                                            | PHYHD1                           | promoter-TSS (ENST00000421063.6)  | 24              | 0.042853 | -1.11              | down          |
|                                            | C2orf74                          | promoter-TSS (ENST00000420918.3)  | -53             | 8.55E-06 | -2.38              | down          |
|                                            | PGGHG                            | promoter-TSS (ENST00000409479.5)  | -406            | 8.04E-05 | -2.09              | down          |
|                                            | IFITM1                           | promoter-TSS (ENST00000408968.3)  | 56              | 9.8E-05  | -2.97              | down          |
|                                            | ITGB2                            | promoter-TSS (ENST00000397857.5)  | -139            | 0.000977 | -4.47              | down          |
|                                            | NRP1                             | promoter-TSS (ENST00000395995.5)  | -281            | 0.001018 | -1.15              | down          |
|                                            | PANX2                            | promoter-TSS (ENST00000395842.2)  | -710            | 0.043984 | -1.44              | down          |
|                                            | IGF2                             | promoter-TSS (ENST00000381406.8)  | -190            | 0.006076 | -1.78              | down          |
|                                            | PAQR7                            | promoter-TSS (ENST00000374296.3)  | -527            | 0.017417 | -1.02              | down          |
|                                            | WNT2B                            | promoter-TSS (ENST00000369684.4)  | -42             | 0.037642 | -1.07              | down          |
|                                            | SV2A                             | promoter-TSS (ENST00000369146.7)  | -145            | 0.010278 | -2.63              | down          |
|                                            | CIART                            | promoter-TSS (ENST00000369095.5)  | -346            | 0.015809 | -1.48              | down          |
|                                            | LGR6                             | promoter-TSS (ENST00000367278.7)  | -514            | 0.012292 | -4.43              | down          |
|                                            | CCDC88B                          | promoter-TSS (ENST00000359902.2)  | -745            | 0.011935 | -1.63              | down          |
|                                            | WNK3                             | promoter-TSS (ENST00000354646.6)  | -256            | 0.026961 | -3.72              | down          |
|                                            | PAK5                             | promoter-TSS (ENST00000353224.9)  | -91             | 0.040812 | -5.12              | down          |
|                                            | EFS                              | promoter-TSS (ENST00000351354.3)  | -435            | 0.023909 | -1.10              | down          |
|                                            | TRPC6                            | promoter-TSS (ENST00000348423.8)  | -13             | 3.01E-05 | -7.75              | down          |
|                                            | NRG2                             | promoter-TSS (ENST00000340391.7)  | -160            | 0.000327 | -3.31              | down          |
|                                            | VWA1                             | promoter-TSS (ENST00000338660.5)  | -49             | 0.000741 | -1.54              | down          |
|                                            | B4GALNT4                         | promoter-TSS (ENST00000329962.10) | -214            | 1.05E-05 | -1.88              | down          |
|                                            | FAIM2                            | promoter-TSS (ENST00000320634.7)  | -71             | 0.019572 | -4.18              | down          |
|                                            | HEG1                             | promoter-TSS (ENST00000311127.8)  | -646            | 0.004292 | -1.51              | down          |
|                                            | AMOT                             | promoter-TSS (ENST00000304758.5)  | -309            | 0.01086  | -4.81              | down          |
|                                            | SIX2                             | promoter-TSS (ENST00000303077.6)  | -265            | 0.009051 | -2.41              | down          |
|                                            | KRT8                             | promoter-TSS (ENST00000293308.11) | -720            | 2.17E-17 | -3.28              | down          |
|                                            | PLEKHH2                          | promoter-TSS (ENST00000282406.8)  | 95              | 0.00657  | -1.02              | down          |
|                                            | NTRK2                            | promoter-TSS (ENST00000277120.7)  | -537            | 0.018174 | -4.82              | down          |
|                                            | PSD2                             | promoter-TSS (ENST00000274710.3)  | -75             | 0.024297 | -6.13              | down          |
|                                            | CABLES1                          | promoter-TSS (ENST00000256925.11) | -5              | 0.02386  | -2.02              | down          |
|                                            | ALDH3A1                          | promoter-TSS (ENST00000225740.10) | 4, 14           | 1.51E-07 | -2.12              | down          |
|                                            | PPP2R2C                          | promoter-TSS (ENST00000506140.5)  | 68              | 0.032996 | 1.26               | up            |
| TNFSF18                                    | promoter-TSS (ENST00000404377.3) | -143                              | 0.000986        | 2.53     | up                 |               |
| PRSS3                                      | promoter-TSS (ENST00000379405.3) | -173                              | 0.003301        | 1.63     | up                 |               |

Continue on the next page...



|                      |                                   |                                   |          |          |       |      |
|----------------------|-----------------------------------|-----------------------------------|----------|----------|-------|------|
| Differentiated state | AC074143.1                        | promoter-TSS (ENST00000518227.1)  | 62       | 0.023879 | -1.60 | down |
|                      | ADGRB2                            | promoter-TSS (ENST00000373658.7)  | -136     | 0.019904 | -1.53 | down |
|                      | ALDH3A1                           | promoter-TSS (ENST00000225740.10) | 4, 14    | 0.000446 | -3.45 | down |
|                      | ALPL                              | promoter-TSS (ENST00000540617.5)  | -93      | 0.011294 | -2.23 | down |
|                      | ANKRD24                           | promoter-TSS (ENST00000262970.9)  | 40       | 0.021459 | -1.28 | down |
|                      | ANKUB1                            | promoter-TSS (ENST00000446160.6)  | 13       | 0.000173 | -2.39 | down |
|                      | APCDD1                            | promoter-TSS (ENST00000578882.1)  | -9       | 0.001778 | -2.84 | down |
|                      | BAIAP3                            | promoter-TSS (ENST00000628027.2)  | -18      | 0.023153 | -1.91 | down |
|                      | BMP8A                             | promoter-TSS (ENST00000331593.5)  | -319     | 0.018854 | -1.70 | down |
|                      | C2orf74                           | promoter-TSS (ENST00000420918.3)  | -53      | 0.004271 | -2.28 | down |
|                      | CBY1                              | promoter-TSS (ENST00000355830.10) | 95       | 8.97E-05 | -1.79 | down |
|                      | CCR10                             | promoter-TSS (ENST00000591765.1)  | -120     | 0.001471 | -2.98 | down |
|                      | COA3                              | promoter-TSS (ENST00000588408.5)  | 573      | 0.005453 | -1.63 | down |
|                      | EFS                               | promoter-TSS (ENST00000351354.3)  | -435     | 0.011481 | -1.25 | down |
|                      | FAIM2                             | promoter-TSS (ENST00000320634.7)  | -71      | 2.78E-05 | -4.25 | down |
|                      | FAM183A                           | promoter-TSS (ENST00000335282.4)  | -272     | 1.09E-05 | -3.55 | down |
|                      | FOXJ1                             | promoter-TSS (ENST00000322957.6)  | -125     | 0.003167 | -2.29 | down |
|                      | FRMPD2                            | promoter-TSS (ENST00000305531.3)  | -16      | 0.033067 | -1.93 | down |
|                      | GLB1L                             | promoter-TSS (ENST00000409640.5)  | 72       | 0.000195 | -2.32 | down |
|                      | GPR162                            | promoter-TSS (ENST00000428545.6)  | -24      | 0.002601 | -3.20 | down |
|                      | GSTM4                             | promoter-TSS (ENST00000369833.5)  | -16      | 0.002384 | -1.97 | down |
|                      | HHEX                              | promoter-TSS (ENST00000282728.9)  | -103     | 0.042015 | -1.91 | down |
|                      | ICAM4                             | promoter-TSS (ENST00000393717.2)  | -424     | 0.023663 | -1.20 | down |
|                      | IGFBP6                            | promoter-TSS (ENST00000549628.1)  | -414     | 0.016203 | -2.67 | down |
|                      | ITPKA                             | promoter-TSS (ENST00000260386.6)  | 11       | 0.00934  | -1.62 | down |
|                      | KCNB1                             | promoter-TSS (ENST00000371741.5)  | -283     | 0.037904 | -1.51 | down |
|                      | KCNH3                             | promoter-TSS (ENST00000257981.6)  | -690     | 0.005005 | -2.28 | down |
|                      | KCNJ16                            | promoter-TSS (ENST00000615244.4)  | -167     | 0.033686 | -3.92 | down |
|                      | KIF18B                            | promoter-TSS (ENST00000587309.5)  | 12       | 3.94E-10 | -4.30 | down |
|                      | KRT8                              | promoter-TSS (ENST00000293308.11) | -720     | 0.010438 | -1.46 | down |
|                      | LGR6                              | promoter-TSS (ENST00000367278.7)  | -514     | 0.012392 | -3.85 | down |
|                      | LMNA                              | promoter-TSS (ENST00000532414.2)  | 125      | 0.028175 | -1.58 | down |
|                      | MPPED1                            | promoter-TSS (ENST00000443721.1)  | -31      | 1.1E-05  | -5.53 | down |
|                      | NPAS1                             | promoter-TSS (ENST00000449844.6)  | 466      | 0.003975 | -1.94 | down |
|                      | NTRK2                             | promoter-TSS (ENST00000277120.7)  | -537     | 0.011582 | -2.62 | down |
|                      | NUPR1                             | promoter-TSS (ENST00000395641.2)  | -45      | 0.008744 | -1.99 | down |
|                      | PAQR5                             | promoter-TSS (ENST00000563004.2)  | 458      | 0.003522 | -1.70 | down |
|                      | PLEKHO1                           | promoter-TSS (ENST00000369124.4)  | -12      | 0.014104 | -1.83 | down |
|                      | PLIN4                             | promoter-TSS (ENST00000633942.1)  | -828     | 0.033122 | -1.19 | down |
|                      | POLR2J                            | promoter-TSS (ENST00000393794.4)  | -121     | 0.013957 | -1.89 | down |
|                      | PPM1N                             | promoter-TSS (ENST00000401593.5)  | -451     | 0.031517 | -1.45 | down |
|                      | PPP1R1B                           | promoter-TSS (ENST00000579000.5)  | -127     | 0.000441 | -3.36 | down |
|                      | RBM24                             | promoter-TSS (ENST00000425446.6)  | 131      | 0.03824  | -1.65 | down |
|                      | RBP7                              | promoter-TSS (ENST00000294435.7)  | 53       | 0.003665 | -3.42 | down |
|                      | REC8                              | promoter-TSS (ENST00000611366.4)  | 56       | 0.035379 | -4.05 | down |
|                      | RND2                              | promoter-TSS (ENST00000587250.3)  | -379     | 8.98E-05 | -2.55 | down |
|                      | RNF157                            | promoter-TSS (ENST00000319945.10) | -401     | 0.004983 | -2.61 | down |
|                      | SEMA4A                            | promoter-TSS (ENST00000368286.6)  | 74       | 0.013837 | -1.09 | down |
| SHISA8               | promoter-TSS (ENST00000621082.1)  | -355                              | 0.000244 | -3.49    | down  |      |
| SIX2                 | promoter-TSS (ENST00000303077.6)  | -265                              | 0.000579 | -2.25    | down  |      |
| SMKR1                | promoter-TSS (ENST00000462322.2)  | 60                                | 1E-05    | -3.84    | down  |      |
| SOX5                 | promoter-TSS (ENST00000546136.5)  | -2                                | 0.002097 | -3.29    | down  |      |
| STMN1                | promoter-TSS (ENST00000399728.5)  | 9                                 | 0.001221 | -1.51    | down  |      |
| SV2A                 | promoter-TSS (ENST00000369146.7)  | -145                              | 0.015212 | -3.39    | down  |      |
| TEKT2                | promoter-TSS (ENST00000446354.2)  | 150                               | 0.000143 | -3.22    | down  |      |
| TFF3                 | promoter-TSS (ENST00000291525.11) | -20                               | 1.89E-07 | -3.70    | down  |      |
| TRPC6                | promoter-TSS (ENST00000348423.8)  | -13                               | 0.000826 | -4.68    | down  |      |
| TLL6                 | promoter-TSS (ENST00000393382.7)  | 100                               | 0.022268 | -2.15    | down  |      |

**Supplementary Table 4.** List of genes with increased chromatin accessibility at exon region and their expressions at stem state and differentiated state

| Gene expression linked to peaks up in TO | Gene ID                                 | Peak Annotation                                                             | Distance to TSS | p-value  | Fold Change (log2) | TO vs. Non-TO |
|------------------------------------------|-----------------------------------------|-----------------------------------------------------------------------------|-----------------|----------|--------------------|---------------|
| <b>Stem state</b>                        | SDCBP2                                  | exon (ENST00000614659.1, exon 4 of 4)                                       | 6912            | 0.001338 | 1.73               | up            |
|                                          | TNFSF14                                 | exon (ENST00000599359.1, exon 2 of 5)                                       | 161             | 0.017341 | 5.37               | up            |
|                                          | ADGRE2                                  | exon (ENST00000596991.6, exon 19 of 20)                                     | 33237           | 0.029884 | 2.05               | up            |
|                                          | VNN2                                    | exon (ENST00000525270.5, exon 2 of 8)                                       | 130             | 0.007287 | 6.87               | up            |
|                                          | CWH43                                   | exon (ENST00000513409.1, exon 6 of 16)                                      | 11877           | 0.000112 | 2.52               | up            |
|                                          | FAM3D                                   | exon (ENST00000482387.6, exon 17 of 17)                                     | -75644          | 0.004619 | 4.43               | up            |
|                                          | MUC4                                    | exon (ENST00000463781.7, exon 2 of 25)                                      | 21603           | 0.015398 | 5.23               | up            |
|                                          | SPINK5                                  | exon (ENST00000398454.5, exon 4 of 28)                                      | 8213            | 0.000721 | 1.10               | up            |
|                                          | GCNT3                                   | exon (ENST00000396065.2, exon 3 of 3)                                       | 6744            | 0.02974  | 3.72               | up            |
|                                          | PIK3AP1                                 | exon (ENST00000371109.3, exon 1 of 10)                                      | 115             | 0.020077 | 1.79               | up            |
|                                          | ESR1                                    | exon (ENST00000338799.9, exon 1 of 9)                                       | 901             | 0.011128 | 2.55               | up            |
|                                          | STX3                                    | exon (ENST00000307552.3, exon 1 of 1)                                       | 111             | 0.009271 | 1.21               | up            |
|                                          | ACER1                                   | exon (ENST00000301452.4, exon 1 of 6)                                       | 169             | 0.016538 | 4.46               | up            |
|                                          | GPRIN1                                  | exon (ENST00000261944.9, exon 27 of 32)                                     | 19688           | 0.045576 | 1.04               | up            |
|                                          | HLF                                     | exon (ENST00000376352.6, exon 18 of 18)                                     | -98065          | 0.003667 | -2.67              | down          |
|                                          | LOX                                     | exon (ENST00000339397.4, exon 8 of 8)                                       | 50017           | 8.60E-05 | -3.09              | down          |
|                                          | CAVIN2                                  | exon (ENST00000304141.4, exon 2 of 2)                                       | 11535           | 3.48E-05 | -1.69              | down          |
| <b>Differentiated state</b>              | ADGRE2                                  | exon (ENST00000596991.6, exon 19 of 20)                                     | 33237           | 0.011349 | 1.86               | up            |
|                                          | BMP3                                    | exon (ENST00000282701.2, exon 1 of 3)                                       | 625             | 6.42E-08 | 2.77               | up            |
|                                          | EMP1                                    | exon (ENST00000256951.9, exon 5 of 5)                                       | 7210            | 0.004608 | 1.10               | up            |
|                                          | ESR1                                    | exon (ENST00000338799.9, exon 1 of 9)                                       | 901             | 0.008816 | 2.68               | up            |
|                                          | FKBP14                                  | exon (ENST00000222803.9, exon 4 of 4)                                       | 13614           | 0.000662 | 1.44               | up            |
|                                          | IRAK3                                   | exon (ENST00000457197.2, exon 4 of 11)                                      | 22300           | 0.000296 | 1.84               | up            |
|                                          | ISM2                                    | exon (ENST00000216484.6, exon 12 of 12)                                     | -9928           | 0.00078  | 2.42               | up            |
|                                          | LAMA3                                   | exon (ENST00000399516.7, exon 33 of 74)                                     | -14929          | 5.21E-09 | 2.94               | up            |
|                                          | MGAM                                    | exon (ENST00000549489.6, exon 11 of 48)                                     | 34593           | 0.033523 | 2.63               | up            |
|                                          | NRG1                                    | exon (ENST00000356819.7, exon 12 of 12)                                     | 44474           | 0.014837 | 1.26               | up            |
|                                          | NTM                                     | exon (ENST00000374791.7, exon 1 of 8)                                       | 360             | 0.038128 | 3.22               | up            |
|                                          | PCDHA13                                 | exon (ENST00000625195.1, exon 1 of 2)                                       | 127             | 0.030017 | 3.86               | up            |
|                                          | PPARG                                   | exon (ENST00000643888.1, exon 7 of 9)                                       | 54510           | 0.007546 | 1.32               | up            |
|                                          | SATB2                                   | exon (ENST00000428695.5, exon 1 of 7)                                       | 207             | 0.026141 | 1.53               | up            |
|                                          | SEC24D                                  | exon (ENST00000511481.5, exon 13 of 16)                                     | 37072           | 0.048046 | 1.16               | up            |
|                                          | STX3                                    | exon (ENST00000307552.3, exon 1 of 1)                                       | 111             | 0.003332 | 1.04               | up            |
|                                          | TNFSF14                                 | exon (ENST00000599359.1, exon 2 of 5)                                       | 161             | 0.002289 | 3.62               | up            |
|                                          | DEGS2                                   | exon (ENST00000544450.6, exon 11 of 11)                                     | 21019           | 0.003834 | -2.36              | down          |
|                                          | EFHC1                                   | exon (ENST00000360726.3, exon 3 of 3)                                       | -16338          | 0.005452 | -1.86              | down          |
|                                          | ERIC3                                   | exon (ENST00000612390.4, exon 3 of 3)                                       | 10371           | 0.040271 | -2.40              | down          |
|                                          | FANK1                                   | exon (ENST00000368676.8, exon 19 of 19), (ENST00000368679.8, exon 23 of 23) | 66975, 39130    | 1.78E-06 | -2.53              | down          |
|                                          | FBF1                                    | exon (ENST00000592193.6, exon 3 of 28)                                      | 4524            | 0.004857 | -1.49              | down          |
|                                          | IL22RA1                                 | exon (ENST00000327535.5, exon 4 of 7)                                       | -18526          | 0.003463 | -1.83              | down          |
|                                          | LCASL                                   | exon (ENST00000485895.6, exon 5 of 5)                                       | 5677            | 0.011146 | -1.79              | down          |
|                                          | MYLK3                                   | exon (ENST00000394809.8, exon 1 of 13)                                      | 387             | 0.006472 | -2.60              | down          |
|                                          | NCAPH                                   | exon (ENST00000427946.5, exon 7 of 17)                                      | 17568           | 0.011858 | -2.33              | down          |
|                                          | NTRK2                                   | exon (ENST00000376208.5, exon 14 of 14)                                     | 203993          | 0.011582 | -2.62              | down          |
| SYNE3                                    | exon (ENST00000557275.5, exon 17 of 17) | 41904                                                                       | 0.04791         | -1.67    | down               |               |
| TCTEX1D1                                 | exon (ENST00000371037.8, exon 22 of 25) | -13116                                                                      | 0.030144        | -2.20    | down               |               |

**Supplementary Table 5.** List of genes with decreased chromatin accessibility at exon region and their expressions at stem state and differentiated state

| Gene expression linked to peaks down in TO | Gene ID | Peak Annotation                         | Distance to TSS | p-value     | Fold Change (log2) | TO vs. Non-TO |
|--------------------------------------------|---------|-----------------------------------------|-----------------|-------------|--------------------|---------------|
| Stem state                                 | GNAT1   | exon (ENST00000232461.7, exon 8 of 9)   | 3172            | 0.04349328  | -4.27              | down          |
|                                            | BMP4    | exon (ENST00000245451.8, exon 1 of 4)   | 257             | 2.75708E-05 | -2.72              | down          |
|                                            | PRPH    | exon (ENST00000257860.8, exon 6 of 9)   | 3849            | 0.013755449 | -4.61              | down          |
|                                            | WNT10A  | exon (ENST00000258411.7, exon 1 of 4)   | 118             | 0.017549088 | -1.05              | down          |
|                                            | PHYHD1  | exon (ENST00000259324.5, exon 4 of 4)   | -3444           | 0.002430617 | -1.15              | down          |
|                                            | IGFBP4  | exon (ENST00000269593.4, exon 1 of 4)   | 343             | 0.013647231 | -1.53              | down          |
|                                            | WNT3A   | exon (ENST00000284523.1, exon 1 of 4)   | 144             | 0.000203853 | -2.11              | down          |
|                                            | SOSTDC1 | exon (ENST00000307068.4, exon 1 of 2)   | 128             | 0.002798447 | -4.11              | down          |
|                                            | CCDC8   | exon (ENST00000307522.4, exon 1 of 1)   | 254             | 0.000165404 | -3.15              | down          |
|                                            | GGT5    | exon (ENST00000327365.8, exon 1 of 12)  | 498             | 1.70261E-12 | -4.43              | down          |
|                                            | METTL7A | exon (ENST00000332160.4, exon 1 of 2)   | 162             | 0.000470109 | -1.68              | down          |
|                                            | CKB     | exon (ENST00000348956.6, exon 1 of 8)   | 148             | 0.003734738 | -1.60              | down          |
|                                            | SUSD2   | exon (ENST00000358321.3, exon 1 of 15)  | 181             | 1.98678E-07 | -3.35              | down          |
|                                            | NRG2    | exon (ENST00000361474.5, exon 1 of 10)  | 332             | 0.00075442  | -2.72              | down          |
|                                            | TREX2   | exon (ENST00000370211.8, exon 8 of 10)  | -7882           | 0.025254889 | -1.24              | down          |
|                                            | LDOC1   | exon (ENST00000370526.3, exon 1 of 1)   | 266             | 1.04493E-06 | -4.72              | down          |
|                                            | SMOC1   | exon (ENST00000381280.4, exon 1 of 12)  | 231             | 2.2141E-06  | -1.69              | down          |
|                                            | RUNX3   | exon (ENST00000399916.5, exon 2 of 6)   | 138             | 0.028468019 | -2.66              | down          |
|                                            | RBM38   | exon (ENST00000417346.1, exon 1 of 2)   | 386             | 0.000912418 | -1.17              | down          |
|                                            | HCAR1   | exon (ENST00000432564.2, exon 1 of 1)   | 4545            | 0.003119762 | -2.92              | down          |
|                                            | PROB1   | exon (ENST00000434752.3, exon 1 of 1)   | 1529            | 0.004149771 | -1.09              | down          |
|                                            | RNF165  | exon (ENST00000588679.1, exon 1 of 1)   | 271             | 3.08181E-10 | -2.52              | down          |
|                                            | MYO15B  | exon (ENST00000610510.4, exon 1 of 63)  | 1077            | 0.026822784 | -1.20              | down          |
|                                            | TPRG1   | exon (ENST00000617246.4, exon 11 of 11) | -65461          | 0.000119316 | -1.21              | down          |
|                                            | PRODH   | exon (ENST00000638240.1, exon 6 of 6)   | -10702          | 0.035269387 | -2.84              | down          |

Continue on the next page...

|                      |                                        |                                          |             |             |       |      |
|----------------------|----------------------------------------|------------------------------------------|-------------|-------------|-------|------|
|                      |                                        |                                          |             |             |       |      |
| Differentiated state | DOK7                                   | exon (ENST00000340083.5, exon 3 of 7)    | 10172       | 0.000405461 | -1.37 | down |
|                      | DOK7                                   | exon (ENST00000340083.5, exon 7 of 7)    | 9813        | 0.000405461 | -1.37 | down |
|                      | ESPN                                   | exon (ENST00000636330.1, exon 11 of 11)  | 7221        | 0.001509439 | -1.52 | down |
|                      | ESPN                                   | exon (ENST00000636330.1, exon 8 of 11)   | 689         | 0.001509439 | -1.52 | down |
|                      | DMRT3                                  | exon (ENST00000190165.2, exon 1 of 2)    | 114         | 0.008928564 | -3.33 | down |
|                      | MAMSTR                                 | exon (ENST00000222145.8, exon 5 of 12)   | -9517       | 0.014971701 | -1.87 | down |
|                      | LGR6                                   | exon (ENST00000255432.11, exon 1 of 18)  | 117         | 0.012391622 | -3.85 | down |
|                      | PRPH                                   | exon (ENST00000257860.8, exon 6 of 9)    | 3849        | 0.038094502 | -2.18 | down |
|                      | PIMREG                                 | exon (ENST00000262483.12, exon 20 of 20) | 10881       | 8.54161E-09 | -4.52 | down |
|                      | UBE2S                                  | exon (ENST00000264552.13, exon 4 of 4)   | 7192        | 0.000996521 | -2.64 | down |
|                      | RCN3                                   | exon (ENST00000270645.7, exon 1 of 7)    | 267         | 0.015963982 | -1.93 | down |
|                      | WNT3A                                  | exon (ENST00000284523.1, exon 1 of 4)    | 144         | 0.007349871 | -2.47 | down |
|                      | HRASLS5                                | exon (ENST00000301790.4, exon 1 of 6)    | 186         | 0.008114229 | -2.35 | down |
|                      | CCDC8                                  | exon (ENST00000307522.4, exon 1 of 1)    | 254         | 0.021311823 | -2.13 | down |
|                      | DEF6                                   | exon (ENST00000316637.6, exon 7 of 11)   | 20520       | 0.002836985 | -1.19 | down |
|                      | PSAPL1                                 | exon (ENST00000319098.6, exon 1 of 1)    | 4304        | 0.000181007 | -3.11 | down |
|                      | GPR62                                  | exon (ENST00000322241.5, exon 1 of 1)    | 1023        | 0.015472082 | -4.30 | down |
|                      | C11orf65                               | exon (ENST00000323468.9, exon 8 of 8)    | -5329       | 0.027419126 | -1.30 | down |
|                      | HMG20B                                 | exon (ENST00000333651.10, exon 8 of 10)  | -4002       | 0.047601065 | -1.00 | down |
|                      | CAPS                                   | exon (ENST00000339485.3, exon 2 of 2)    | -1510       | 1.26422E-05 | -4.04 | down |
|                      | IFT27                                  | exon (ENST00000340630.9, exon 5 of 7)    | 12156       | 0.000165931 | -2.66 | down |
|                      | CKB                                    | exon (ENST00000348956.6, exon 1 of 8)    | 148         | 1.79983E-05 | -2.56 | down |
|                      | PLEKHA4                                | exon (ENST00000355496.9, exon 8 of 17)   | 9515        | 0.004077529 | -1.35 | down |
|                      | ITPR1PL1                               | exon (ENST00000361124.5, exon 1 of 1)    | 4084        | 2.18949E-05 | -2.68 | down |
|                      | ABCA4                                  | exon (ENST00000370225.3, exon 33 of 50)  | 41336       | 0.037652708 | -1.21 | down |
|                      | LDOC1                                  | exon (ENST00000370526.3, exon 1 of 1)    | 266         | 0.00679574  | -2.83 | down |
|                      | CFP                                    | exon (ENST00000376983.7, exon 5 of 7)    | -7695       | 0.006550587 | -2.66 | down |
|                      | ZBTB48                                 | exon (ENST00000377674.8, exon 8 of 11)   | 8052        | 0.013524327 | -1.59 | down |
|                      | SERP2                                  | exon (ENST00000379179.7, exon 1 of 3)    | 106         | 0.03630176  | -1.72 | down |
|                      | SPEF1                                  | exon (ENST00000379756.3, exon 7 of 7)    | 3460        | 0.000514229 | -3.48 | down |
|                      | SLC47A1                                | exon (ENST00000395585.5, exon 1 of 19)   | 116         | 0.048438318 | -3.72 | down |
|                      | RBM38                                  | exon (ENST00000417346.1, exon 1 of 2)    | 386         | 0.002178803 | -1.53 | down |
|                      | ISOC2                                  | exon (ENST00000438389.6, exon 5 of 5)    | 8401        | 0.002990006 | -2.68 | down |
|                      | MMP23B                                 | exon (ENST00000505820.6, exon 20 of 20)  | -1643       | 0.02507483  | -4.87 | down |
|                      | NDUFA9                                 | exon (ENST00000527518.1, exon 4 of 4)    | 16196       | 0.035511362 | -1.61 | down |
|                      | MYO15B                                 | exon (ENST00000610510.4, exon 1 of 63)   | 1077        | 0.010998191 | -1.93 | down |
|                      | PRR5                                   | exon (ENST00000617066.4, exon 1 of 8)    | 128         | 0.048949757 | -1.49 | down |
|                      | TPRG1                                  | exon (ENST00000617246.4, exon 11 of 11)  | -65461      | 0.02411273  | -1.53 | down |
|                      | PRODH                                  | exon (ENST00000638240.1, exon 6 of 6)    | -10702      | 0.040648883 | -2.72 | down |
|                      | BMP4                                   | exon (ENST00000245451.8, exon 1 of 4)    | 257         | 0.004487366 | 1.89  | up   |
|                      | EFHD1                                  | exon (ENST00000264059.7, exon 1 of 4)    | 614         | 0.022659204 | 3.07  | up   |
|                      | GAL                                    | exon (ENST00000265643.3, exon 1 of 6)    | 225         | 0.039827589 | 4.59  | up   |
|                      | MYOM3                                  | exon (ENST00000270800.1, exon 7 of 7)    | -8239       | 7.24585E-05 | 2.42  | up   |
|                      | CXCL8                                  | exon (ENST00000307407.7, exon 1 of 4)    | 131         | 0.001728359 | 3.12  | up   |
|                      | SPOCK2                                 | exon (ENST00000317376.8, exon 2 of 12)   | 228         | 1.51222E-15 | 5.48  | up   |
|                      | SLC39A14                               | exon (ENST00000356766.10, exon 23 of 23) | -11881      | 0.000272043 | 1.87  | up   |
|                      | DKK3                                   | exon (ENST00000396505.6, exon 2 of 8)    | 625         | 3.17259E-07 | 2.19  | up   |
| NAT8L                | exon (ENST00000423729.2, exon 3 of 3)  | 4783                                     | 0.002674438 | 5.83        | up    |      |
| CPAMD8               | exon (ENST00000443236.5, exon 1 of 42) | 242                                      | 0.000416259 | 1.96        | up    |      |
| BIRC3                | exon (ENST00000615299.4, exon 3 of 10) | 7144                                     | 0.000404694 | 2.52        | up    |      |

**Supplementary Table 6.** List of genes with decreased chromatin accessibility at intron region and their expressions at differentiated state

| Gene expression linked to peaks down in TO | Gene ID                                     | Peak Annotation                             | Distance to TSS | p-value   | Fold Change (log2) | TO vs. Non-TO |
|--------------------------------------------|---------------------------------------------|---------------------------------------------|-----------------|-----------|--------------------|---------------|
| Differentiated state                       | FOXP1                                       | intron (ENST00000475937.5, intron 10 of 19) | 31578           | 0.039143  | -1.61              | down          |
|                                            | FOXP1                                       | intron (ENST00000475937.5, intron 11 of 19) | 57529           |           |                    | down          |
|                                            | FOXP1                                       | intron (ENST00000475937.5, intron 2 of 19)  | 55389           |           |                    | down          |
|                                            | FOXP1                                       | intron (ENST00000475937.5, intron 2 of 19)  | 59619           |           |                    | down          |
|                                            | FOXP1                                       | intron (ENST00000475937.5, intron 5 of 19)  | 2804            |           |                    | down          |
|                                            | FOXP1                                       | intron (ENST00000475937.5, intron 5 of 19)  | 9227            |           |                    | down          |
|                                            | FOXP1                                       | intron (ENST00000647725.1, intron 6 of 25)  | -13861          |           |                    | down          |
|                                            | ZBTB7C                                      | intron (ENST00000590800.5, intron 1 of 4)   | 25014           | 0.045913  | -1.28              | down          |
|                                            | ZBTB7C                                      | intron (ENST00000590800.5, intron 3 of 4)   | 63961           |           |                    | down          |
|                                            | ZBTB7C                                      | intron (ENST00000590800.5, intron 3 of 4)   | 3689            |           |                    | down          |
|                                            | ZBTB7C                                      | intron (ENST00000590800.5, intron 3 of 4)   | -2207           |           |                    | down          |
|                                            | ZBTB7C                                      | intron (ENST00000590800.5, intron 3 of 4)   | 17744           |           |                    | down          |
|                                            | LGR6                                        | intron (ENST00000367278.7, intron 1 of 17)  | -3719           | 0.0123916 | -3.85              | down          |
|                                            | LGR6                                        | intron (ENST00000367278.7, intron 3 of 17)  | 15253           |           |                    | down          |
|                                            | LGR6                                        | intron (ENST00000439764.2, intron 1 of 15)  | 8298            |           |                    | down          |
|                                            | LGR6                                        | intron (ENST00000439764.2, intron 1 of 15)  | 399             |           |                    | down          |
|                                            | IL2RB                                       | intron (ENST00000216223.9, intron 1 of 9)   | 4082            | 0.0232101 | -3.29              | down          |
|                                            | IL2RB                                       | intron (ENST00000216223.9, intron 2 of 9)   | 6112            |           |                    | down          |
|                                            | IL2RB                                       | intron (ENST00000216223.9, intron 9 of 9)   | 18308           |           |                    | down          |
|                                            | PRODH                                       | intron (ENST00000334029.6, intron 1 of 13)  | 1866            | 0.0406489 | -2.72              | down          |
|                                            | PRODH                                       | intron (ENST00000334029.6, intron 2 of 13)  | 6505            |           |                    | down          |
|                                            | PRODH                                       | intron (ENST00000640084.1, intron 2 of 3)   | -2236           |           |                    | down          |
|                                            | GRM4                                        | intron (ENST00000374177.7, intron 1 of 8)   | 760             | 0.0106985 | -2.27              | down          |
|                                            | GRM4                                        | intron (ENST00000374177.7, intron 1 of 8)   | -4412           |           |                    | down          |
|                                            | GRM4                                        | intron (ENST00000538487.6, intron 1 of 10)  | 643             |           |                    | down          |
|                                            | RPL37A                                      | intron (ENST00000446558.5, intron 3 of 3)   | 41227           | 0.0014269 | -2.25              | down          |
|                                            | RPL37A                                      | intron (ENST00000446558.5, intron 3 of 3)   | 52776           |           |                    | down          |
|                                            | RPL37A                                      | intron (ENST00000446558.5, intron 3 of 3)   | 34741           |           |                    | down          |
|                                            | SERPINF1                                    | intron (ENST00000254722.8, intron 3 of 7)   | 8366            | 0.0032762 | -1.65              | down          |
|                                            | SERPINF1                                    | intron (ENST00000305513.11, intron 5 of 10) | 31351           |           |                    | down          |
|                                            | TRPV4                                       | intron (ENST00000261740.6, intron 1 of 15)  | -6104           | 0.022084  | -1.12              | down          |
|                                            | TRPV4                                       | intron (ENST00000261740.6, intron 1 of 15)  | -4403           |           |                    | down          |
|                                            | KRT8                                        | intron (ENST00000293308.11, intron 1 of 8)  | 1519            | 0.010438  | -1.46              | down          |
|                                            | KRT8                                        | intron (ENST00000552551.5, intron 2 of 8)   | 2845            |           |                    | down          |
|                                            | CYP251                                      | intron (ENST00000310054.8, intron 1 of 8)   | 495             | 0.0072782 | -1.34              | down          |
|                                            | CYP251                                      | intron (ENST00000310054.8, intron 2 of 8)   | 2754            |           |                    | down          |
|                                            | ELN                                         | intron (ENST00000320492.11, intron 4 of 28) | 11549           | 0.0008747 | -3.69              | down          |
|                                            | ELN                                         | intron (ENST00000414324.5, intron 1 of 30)  | 4279            |           |                    | down          |
|                                            | NTRK2                                       | intron (ENST00000323115.8, intron 11 of 16) | 181509          | 0.0115815 | -2.62              | down          |
|                                            | NTRK2                                       | intron (ENST00000395882.5, intron 6 of 12)  | 41203           |           |                    | down          |
|                                            | PLA2G4E                                     | intron (ENST00000399518.3, intron 1 of 19)  | 15962           | 0.0028415 | -2.39              | down          |
|                                            | PLA2G4E                                     | intron (ENST00000399518.3, intron 1 of 19)  | 19624           |           |                    | down          |
|                                            | UMODL1                                      | intron (ENST00000400424.6, intron 1 of 22)  | 1292            | 0.0143468 | -2.40              | down          |
|                                            | UMODL1                                      | intron (ENST00000400424.6, intron 2 of 22)  | 7841            |           |                    | down          |
|                                            | MRV1                                        | intron (ENST00000541483.5, intron 1 of 19)  | -2547           | 0.0013676 | -2.29              | down          |
|                                            | MRV1                                        | intron (ENST00000541483.5, intron 1 of 19)  | -7299           |           |                    | down          |
|                                            | FAIM2                                       | intron (ENST00000550890.5, intron 4 of 10)  | 5835            | 2.782E-05 | -4.25              | down          |
|                                            | FAIM2                                       | intron (ENST00000550890.5, intron 9 of 10)  | 13946           |           |                    | down          |
|                                            | DMRT3                                       | intron (ENST00000569227.1, intron 3 of 4)   | -63286          | 0.0089286 | -3.33              | down          |
|                                            | DMRT3                                       | intron (ENST00000569227.1, intron 4 of 4)   | -16794          |           |                    | down          |
| ELFN2                                      | intron (ENST00000613079.4, intron 1 of 2)   | 7579                                        | 0.0341975       | -1.00     | down               |               |
| ELFN2                                      | intron (ENST00000613079.4, intron 1 of 2)   | 660                                         |                 |           | down               |               |
| STPG1                                      | intron (ENST00000003583.12, intron 3 of 7)  | 33895                                       | 0.0009024       | -1.14     | down               |               |
| GALK1                                      | intron (ENST00000200181.7, intron 26 of 39) | 17176                                       | 0.0351854       | -1.82     | down               |               |
| SLC22A4                                    | intron (ENST00000200652.3, intron 4 of 9)   | 28033                                       | 0.0237632       | -1.31     | down               |               |
| FOXN1                                      | intron (ENST00000226247.2, intron 3 of 7)   | 4134                                        | 1.679E-05       | -3.37     | down               |               |
| RPL10A                                     | intron (ENST00000229769.2, intron 8 of 9)   | -6987                                       | 7.965E-05       | -1.42     | down               |               |

Continue on the next page...

|                      |           |                                             |         |           |       |      |
|----------------------|-----------|---------------------------------------------|---------|-----------|-------|------|
|                      | MAPRE3    | intron (ENST00000233121.6, intron 1 of 6)   | 699     | 0.0030833 | -1.12 | down |
|                      | QTRT1     | intron (ENST00000250237.9, intron 3 of 9)   | 5310    | 0.0270079 | -1.25 | down |
|                      | EEF1AKMT1 | intron (ENST00000255305.10, intron 9 of 22) | -40441  | 0.0086936 | -1.32 | down |
|                      | HRASLS2   | intron (ENST00000255695.1, intron 1 of 3)   | 2568    | 1.667E-06 | -3.08 | down |
|                      | KCNH3     | intron (ENST00000257981.6, intron 7 of 14)  | 8919    | 0.0050047 | -2.28 | down |
|                      | PSMB7     | intron (ENST00000259457.7, intron 5 of 7)   | 15632   | 0.0419781 | -1.39 | down |
|                      | GMPR      | intron (ENST00000259727.4, intron 1 of 8)   | 4771    | 0.0227813 | -1.04 | down |
|                      | CYSTM1    | intron (ENST00000261811.5, intron 1 of 2)   | 7274    | 0.0008925 | -1.30 | down |
|                      | TRMU      | intron (ENST00000262738.7, intron 15 of 34) | 55388   | 0.0371333 | -1.63 | down |
|                      | RAB36     | intron (ENST00000263116.6, intron 2 of 10)  | 2464    | 0.0017616 | -2.26 | down |
|                      | CLDN5     | intron (ENST00000263201.5, intron 13 of 18) | 13385   | 0.0012544 | -3.74 | down |
|                      | CALR3     | intron (ENST00000269881.7, intron 3 of 8)   | 7301    | 0.0486552 | -4.91 | down |
|                      | WDR66     | intron (ENST00000288912.8, intron 8 of 21)  | 31493   | 2.801E-06 | -1.57 | down |
|                      | PPP1R16A  | intron (ENST00000292539.8, intron 1 of 10)  | -2063   | 0.0003827 | -2.08 | down |
|                      | POC1A     | intron (ENST00000296484.6, intron 9 of 10)  | 47230   | 0.0002618 | -2.62 | down |
|                      | MAP1A     | intron (ENST00000300231.5, intron 1 of 5)   | 770     | 0.0182915 | -2.34 | down |
|                      | TKFC      | intron (ENST00000301764.11, intron 5 of 26) | -6962   | 0.0004774 | -1.30 | down |
|                      | SPATA24   | intron (ENST00000302060.9, intron 7 of 7)   | -11275  | 0.0045507 | -1.79 | down |
|                      | ABR       | intron (ENST00000302538.9, intron 2 of 22)  | -2175   | 0.0099194 | -2.78 | down |
|                      | ASPSCR1   | intron (ENST00000306739.8, intron 4 of 15)  | 14172   | 0.0305452 | -1.66 | down |
|                      | SCNN1B    | intron (ENST00000307331.9, intron 2 of 13)  | 20841   | 0.010799  | -1.48 | down |
|                      | LKAAEAR1  | intron (ENST00000308906.6, intron 1 of 1)   | 604     | 6.696E-06 | -4.77 | down |
|                      | SOBP      | intron (ENST00000317357.9, intron 1 of 6)   | 2860    | 0.024268  | -1.88 | down |
|                      | HYAL1     | intron (ENST00000320295.12, intron 1 of 5)  | 2096    | 0.028551  | -1.74 | down |
| Differentiated state | CCDC34    | intron (ENST00000328697.10, intron 1 of 5)  | 5598    | 5.178E-05 | -1.68 | down |
|                      | BMP8A     | intron (ENST00000331593.5, intron 1 of 6)   | 9538    | 0.0188536 | -1.70 | down |
|                      | BRAT1     | intron (ENST00000340611.8, intron 6 of 13)  | 13465   | 0.0249898 | -1.27 | down |
|                      | CCDC30    | intron (ENST00000340612.5, intron 1 of 20)  | 4072    | 0.0492074 | -1.47 | down |
|                      | SERPINB4  | intron (ENST00000341074.9, intron 4 of 7)   | 2800    | 0.0088926 | -1.18 | down |
|                      | SSBP4     | intron (ENST00000348495.10, intron 4 of 16) | -4182   | 0.0004209 | -2.04 | down |
|                      | SLC47A2   | intron (ENST00000350657.9, intron 8 of 17)  | 9434    | 0.0218463 | -1.22 | down |
|                      | SPTBN4    | intron (ENST00000352632.7, intron 3 of 35)  | 20826   | 0.0025147 | -2.55 | down |
|                      | NR2E3     | intron (ENST00000355327.7, intron 8 of 17)  | -115506 | 0.0140028 | -2.69 | down |
|                      | BOC       | intron (ENST00000355385.7, intron 4 of 19)  | 47646   | 0.001236  | -1.28 | down |
|                      | DTNBP1    | intron (ENST00000355917.7, intron 6 of 8)   | 8179    | 0.034845  | -1.42 | down |
|                      | OSCP1     | intron (ENST00000356637.9, intron 1 of 10)  | 1616    | 3.272E-05 | -2.65 | down |
|                      | ASTN2     | intron (ENST00000361209.6, intron 16 of 21) | 45326   | 0.0115199 | -1.17 | down |
|                      | UBE2T     | intron (ENST00000367278.7, intron 6 of 17)  | 49495   | 1.795E-05 | -1.46 | down |
|                      | MYB       | intron (ENST00000367814.8, intron 1 of 14)  | 4036    | 0.0162834 | -1.89 | down |
|                      | SEMA4A    | intron (ENST00000368284.5, intron 6 of 12)  | 6945    | 0.0138373 | -1.09 | down |
|                      | PMVK      | intron (ENST00000368467.3, intron 2 of 4)   | 4697    | 0.0062004 | -1.86 | down |
|                      | PSMD4     | intron (ENST00000368884.7, intron 1 of 9)   | 4778    | 0.0171525 | -1.47 | down |
|                      | BEND5     | intron (ENST00000371833.3, intron 4 of 5)   | 35188   | 0.042724  | -2.14 | down |
|                      | CEL       | intron (ENST00000372080.6, intron 7 of 10)  | 5709    | 2.152E-05 | -1.49 | down |
|                      | RSPH9     | intron (ENST00000372165.8, intron 1 of 5)   | 352     | 4.689E-05 | -3.68 | down |
|                      | CCDC24    | intron (ENST00000372318.7, intron 5 of 8)   | 2645    | 0.0007492 | -2.10 | down |
|                      | ANGPTL2   | intron (ENST00000373425.7, intron 1 of 4)   | 10000   | 0.0006579 | -4.14 | down |
|                      | ADGRB2    | intron (ENST00000373655.6, intron 1 of 32)  | 975     | 0.019904  | -1.53 | down |
|                      | PIGU      | intron (ENST00000374820.6, intron 5 of 10)  | 52376   | 0.0239794 | -1.62 | down |
|                      | CROCC     | intron (ENST00000375541.9, intron 3 of 36)  | 3667    | 0.0005887 | -2.04 | down |

Continue on the next page...

|                      |                                            |                                             |           |           |       |      |
|----------------------|--------------------------------------------|---------------------------------------------|-----------|-----------|-------|------|
| Differentiated state | AQP7                                       | intron (ENST00000377425.8, intron 2 of 6)   | 2743      | 0.0079073 | -2.17 | down |
|                      | FOLR1                                      | intron (ENST00000378140.3, intron 2 of 2)   | -8258     | 0.0279488 | -1.69 | down |
|                      | NWD1                                       | intron (ENST00000379808.7, intron 1 of 16)  | 2986      | 0.0212596 | -2.32 | down |
|                      | CCDC57                                     | intron (ENST00000392347.5, intron 14 of 16) | 18421     | 0.000774  | -1.81 | down |
|                      | ANKRD39                                    | intron (ENST00000393537.4, intron 1 of 3)   | 2914      | 0.0448068 | -1.52 | down |
|                      | RAB17                                      | intron (ENST00000409822.1, intron 1 of 4)   | 8317      | 0.0391141 | -1.23 | down |
|                      | CDCA7                                      | intron (ENST00000410019.3, intron 1 of 7)   | 597       | 0.0108253 | -3.76 | down |
|                      | FBXO15                                     | intron (ENST00000419743.6, intron 1 of 9)   | 5908      | 0.000598  | -2.90 | down |
|                      | PIMREG                                     | intron (ENST00000421306.7, intron 10 of 18) | 26985     | 8.542E-09 | -4.52 | down |
|                      | NT5C3B                                     | intron (ENST00000435506.6, intron 1 of 8)   | 162       | 0.0273074 | -1.60 | down |
|                      | ZNF487                                     | intron (ENST00000437590.2, intron 1 of 3)   | 8320      | 1.418E-05 | -1.72 | down |
|                      | CYHR1                                      | intron (ENST00000438911.6, intron 2 of 4)   | 6464      | 0.0452385 | -1.15 | down |
|                      | MPPED1                                     | intron (ENST00000443721.1, intron 1 of 6)   | 12718     | 1.097E-05 | -5.53 | down |
|                      | IGFBP5                                     | intron (ENST00000447289.1, intron 1 of 3)   | -15507    | 0.0188297 | -2.64 | down |
|                      | ATP5MF                                     | intron (ENST00000449683.5, intron 1 of 3)   | 5310      | 0.0073866 | -2.13 | down |
|                      | FAM166B                                    | intron (ENST00000455600.1, intron 2 of 11)  | 9869      | 0.0006031 | -2.90 | down |
|                      | FAM178B                                    | intron (ENST00000490605.2, intron 12 of 16) | -19015    | 0.0033887 | -2.95 | down |
|                      | TXNRD2                                     | intron (ENST00000491939.6, intron 7 of 11)  | 20186     | 0.0295864 | -1.48 | down |
|                      | EFNA3                                      | intron (ENST00000505139.1, intron 1 of 4)   | -5374     | 0.0227855 | -1.89 | down |
|                      | TOP1MT                                     | intron (ENST00000519148.5, intron 1 of 13)  | 4700      | 0.0276524 | -1.06 | down |
|                      | NAALADL1                                   | intron (ENST00000526799.5, intron 2 of 7)   | 549       | 5.671E-05 | -2.91 | down |
|                      | NR1H3                                      | intron (ENST00000529444.5, intron 5 of 8)   | -4854     | 0.0012189 | -2.04 | down |
|                      | NPIP86                                     | intron (ENST00000532254.1, intron 1 of 6)   | 860       | 0.0059014 | -2.88 | down |
|                      | ANKRD65                                    | intron (ENST00000537107.5, intron 2 of 3)   | 379       | 9.626E-05 | -2.45 | down |
|                      | KIF6                                       | intron (ENST00000538893.5, intron 12 of 21) | -23482    | 0.0011879 | -2.48 | down |
|                      | CNBD2                                      | intron (ENST00000538900.1, intron 7 of 10)  | 24426     | 0.0138565 | -3.70 | down |
|                      | PTMS                                       | intron (ENST00000539187.5, intron 1 of 7)   | -2091     | 0.0014826 | -2.12 | down |
|                      | FAM186A                                    | intron (ENST00000543111.5, intron 4 of 7)   | 1621      | 0.0488133 | -2.15 | down |
|                      | SLC27A2                                    | intron (ENST00000544960.1, intron 1 of 10)  | 2299      | 0.0456375 | -1.71 | down |
|                      | MESP1                                      | intron (ENST00000560294.5, intron 13 of 16) | 15970     | 0.0211654 | -3.07 | down |
|                      | LRRC49                                     | intron (ENST00000560369.5, intron 6 of 15)  | 16913     | 0.0001149 | -1.74 | down |
|                      | LRRC36                                     | intron (ENST00000563189.5, intron 2 of 10)  | 11863     | 0.0005613 | -3.32 | down |
|                      | SCX                                        | intron (ENST00000569669.5, intron 3 of 15)  | 6560      | 0.0073543 | -2.30 | down |
|                      | PKMYT1                                     | intron (ENST00000573944.5, intron 2 of 8)   | 2557      | 4.303E-17 | -4.61 | down |
|                      | ZNF232                                     | intron (ENST00000574788.5, intron 4 of 37)  | 164       | 0.0001396 | -1.41 | down |
|                      | CLUAP1                                     | intron (ENST00000576634.5, intron 5 of 11)  | 4541      | 2.443E-05 | -1.83 | down |
|                      | MBD3                                       | intron (ENST00000585937.1, intron 2 of 6)   | 2798      | 0.0107518 | -2.23 | down |
|                      | KCNJ16                                     | intron (ENST00000586462.1, intron 1 of 1)   | 953       | 0.033686  | -3.92 | down |
|                      | TMEM161A                                   | intron (ENST00000587583.6, intron 11 of 11) | 17815     | 0.0475359 | -1.21 | down |
|                      | FOXJ1                                      | intron (ENST00000590137.1, intron 6 of 7)   | -6687     | 0.0031671 | -2.29 | down |
|                      | PRKCSH                                     | intron (ENST00000591462.5, intron 10 of 18) | 10795     | 0.0499495 | -1.34 | down |
|                      | SPC24                                      | intron (ENST00000592540.5, intron 1 of 4)   | 2678      | 1.877E-08 | -4.10 | down |
|                      | RFX2                                       | intron (ENST00000592546.5, intron 5 of 16)  | 26743     | 0.0018349 | -1.92 | down |
|                      | KIF18B                                     | intron (ENST00000593135.5, intron 1 of 15)  | -4261     | 3.942E-10 | -4.30 | down |
|                      | PEX11G                                     | intron (ENST00000593942.5, intron 1 of 6)   | 2646      | 0.0005022 | -2.78 | down |
|                      | BCAT2                                      | intron (ENST00000599157.5, intron 4 of 7)   | -8763     | 0.0007964 | -1.18 | down |
|                      | IL24                                       | intron (ENST00000611909.4, intron 2 of 4)   | 1290      | 0.0081832 | -2.34 | down |
| RAB44                | intron (ENST00000612677.5, intron 4 of 13) | 18839                                       | 0.0027756 | -2.84     | down  |      |
| SCARF2               | intron (ENST00000622235.4, intron 1 of 10) | 409                                         | 0.0004136 | -2.43     | down  |      |
| EFHC1                | intron (ENST00000636379.1, intron 2 of 9)  | 3036                                        | 0.0054518 | -1.86     | down  |      |
| GAMT                 | intron (ENST00000640762.1, intron 1 of 5)  | 493                                         | 0.0420347 | -1.58     | down  |      |
| TPRG1                | intron (ENST00000640853.1, intron 8 of 10) | -92361                                      | 0.0241127 | -1.53     | down  |      |
| DOK7                 | intron (ENST00000643608.1, intron 2 of 7)  | 7339                                        | 0.0004055 | -1.37     | down  |      |

Supplementary table 2-6, Fisher's exact tests were applied to identify the significance.
