# Supplementary material for: Malfunction of airway basal stem cells plays a crucial role in pathophysiology of tracheobronchopathia osteoplastica
Source: PubMed Central journal article supplement (PMC8921516; doi:10.1038/s41467-022-28903-7), 2022-03-14
Supplement: 41467_2022_28903_MOESM3_ESM.pdf [file 41467_2022_28903_MOESM3_ESM.pdf]

## Reporting Summary

Nature Research wishes to improve the reproducibility of the work that we publish. This form provides structure for consistency and transparency in reporting. For further information on Nature Research policies, see our [Editorial Policies](#) and the [Editorial Policy Checklist](#).

### Statistics

For all statistical analyses, confirm that the following items are present in the figure legend, table legend, main text, or Methods section.

n/a Confirmed

- |                                     |                                     |                                                                                                                                                                                                                                                            |
|-------------------------------------|-------------------------------------|------------------------------------------------------------------------------------------------------------------------------------------------------------------------------------------------------------------------------------------------------------|
| <input type="checkbox"/>            | <input checked="" type="checkbox"/> | The exact sample size ( $n$ ) for each experimental group/condition, given as a discrete number and unit of measurement                                                                                                                                    |
| <input type="checkbox"/>            | <input checked="" type="checkbox"/> | A statement on whether measurements were taken from distinct samples or whether the same sample was measured repeatedly                                                                                                                                    |
| <input type="checkbox"/>            | <input checked="" type="checkbox"/> | The statistical test(s) used AND whether they are one- or two-sided<br><i>Only common tests should be described solely by name; describe more complex techniques in the Methods section.</i>                                                               |
| <input checked="" type="checkbox"/> | <input type="checkbox"/>            | A description of all covariates tested                                                                                                                                                                                                                     |
| <input checked="" type="checkbox"/> | <input type="checkbox"/>            | A description of any assumptions or corrections, such as tests of normality and adjustment for multiple comparisons                                                                                                                                        |
| <input type="checkbox"/>            | <input checked="" type="checkbox"/> | A full description of the statistical parameters including central tendency (e.g. means) or other basic estimates (e.g. regression coefficient) AND variation (e.g. standard deviation) or associated estimates of uncertainty (e.g. confidence intervals) |
| <input type="checkbox"/>            | <input checked="" type="checkbox"/> | For null hypothesis testing, the test statistic (e.g. $F$ , $t$ , $r$ ) with confidence intervals, effect sizes, degrees of freedom and $P$ value noted<br><i>Give <math>P</math> values as exact values whenever suitable.</i>                            |
| <input checked="" type="checkbox"/> | <input type="checkbox"/>            | For Bayesian analysis, information on the choice of priors and Markov chain Monte Carlo settings                                                                                                                                                           |
| <input checked="" type="checkbox"/> | <input type="checkbox"/>            | For hierarchical and complex designs, identification of the appropriate level for tests and full reporting of outcomes                                                                                                                                     |
| <input type="checkbox"/>            | <input checked="" type="checkbox"/> | Estimates of effect sizes (e.g. Cohen's $d$ , Pearson's $r$ ), indicating how they were calculated                                                                                                                                                         |

*Our web collection on [statistics for biologists](#) contains articles on many of the points above.*

### Software and code

Policy information about [availability of computer code](#)

Data collection

For microscopy data collection, Olympus cellSens Imaging Software Standard, ZEN 2.6 lite and Leica Application Suite X Version 1.0 were used. For real-time PCR data collection, QuantStudio 5 System was used.

Data analysis

For image analysis, Fiji (version 2.1.0/1.53c), HALO v3.0.311.293 were used.  
For sequencing data processing and analysis, STAR v2.7.9a, HTSeq v0.6.0, DESeq2 v1.34.0, GSEA v4.1.0, BWA-MEM v2.2.1, MACS2 v2.2.7.1, deepTools 3.5.0, UpSetR v1.0.3, Bedtools v2.30.0, Bedtools multicov v2.30.0, HOMER v4.11, IGV 2.8.6 were used.  
For statistical analysis, Microsoft Excel, GraphPad Prism 9 were used.

For manuscripts utilizing custom algorithms or software that are central to the research but not yet described in published literature, software must be made available to editors and reviewers. We strongly encourage code deposition in a community repository (e.g. GitHub). See the Nature Research [guidelines for submitting code & software](#) for further information.

### Data

Policy information about [availability of data](#)

All manuscripts must include a [data availability statement](#). This statement should provide the following information, where applicable:

- Accession codes, unique identifiers, or web links for publicly available datasets
- A list of figures that have associated raw data
- A description of any restrictions on data availability

RNA-Seq and ATAC-Seq data have been deposited and are openly available at the NCBI's Gene Expression Omnibus database under accession code GSE153390 (<https://www.ncbi.nlm.nih.gov/geo/query/acc.cgi?acc=GSE153390>). All other data supporting the findings of this study are available within this article and its Supplementary Information files and Source Data file. A reporting summary linked to this article is available as a Supplementary Information file. Source data are

## Field-specific reporting

Please select the one below that is the best fit for your research. If you are not sure, read the appropriate sections before making your selection.

- Life sciences     Behavioural & social sciences     Ecological, evolutionary & environmental sciences

For a reference copy of the document with all sections, see [nature.com/documents/nr-reporting-summary-flat.pdf](https://www.nature.com/documents/nr-reporting-summary-flat.pdf)

## Life sciences study design

All studies must disclose on these points even when the disclosure is negative.

|                 |                                                                                                                                                                                                                                                                                                                                                                                                     |
|-----------------|-----------------------------------------------------------------------------------------------------------------------------------------------------------------------------------------------------------------------------------------------------------------------------------------------------------------------------------------------------------------------------------------------------|
| Sample size     | Tracheobronchopathia osteochondroplastica is an under-detected airway disease. Due to overlapping symptomology and lack of sufficient awareness, the condition is often missed in clinic. Most patients were identified incidentally during intubation, CT and bronchoscopy for other indications. We aimed to collect all eligible cases that could be identified during the period of this study. |
| Data exclusions | Five cases were excluded from the study, because of comorbidity (i.e. three accompanied with lung cancer, one accompanied with Chondritis and another one with Sarcoidosis and Bronchiectasis).                                                                                                                                                                                                     |
| Replication     | All experimental findings were verified by replication and/or repeated measurements. All attempts to reproduce data were successful. The number of replicates is defined in figure legends.                                                                                                                                                                                                         |
| Randomization   | Samples were divided into non-disease and disease groups based on patients' diagnosis.                                                                                                                                                                                                                                                                                                              |
| Blinding        | Investigators were blinded from clinical details (e.g. stage, type, history, etc.) until cell characterization and differentiation assessment had been completed.                                                                                                                                                                                                                                   |

## Reporting for specific materials, systems and methods

We require information from authors about some types of materials, experimental systems and methods used in many studies. Here, indicate whether each material, system or method listed is relevant to your study. If you are not sure if a list item applies to your research, read the appropriate section before selecting a response.

### Materials & experimental systems

| n/a                                 | Involved in the study                                           |
|-------------------------------------|-----------------------------------------------------------------|
| <input type="checkbox"/>            | <input checked="" type="checkbox"/> Antibodies                  |
| <input type="checkbox"/>            | <input checked="" type="checkbox"/> Eukaryotic cell lines       |
| <input checked="" type="checkbox"/> | <input type="checkbox"/> Palaeontology and archaeology          |
| <input type="checkbox"/>            | <input checked="" type="checkbox"/> Animals and other organisms |
| <input type="checkbox"/>            | <input checked="" type="checkbox"/> Human research participants |
| <input checked="" type="checkbox"/> | <input type="checkbox"/> Clinical data                          |
| <input checked="" type="checkbox"/> | <input type="checkbox"/> Dual use research of concern           |

### Methods

| n/a                                 | Involved in the study                           |
|-------------------------------------|-------------------------------------------------|
| <input checked="" type="checkbox"/> | <input type="checkbox"/> ChIP-seq               |
| <input checked="" type="checkbox"/> | <input type="checkbox"/> Flow cytometry         |
| <input checked="" type="checkbox"/> | <input type="checkbox"/> MRI-based neuroimaging |

## Antibodies

| Antibodies used | Antibodies         | Supplier          | Catalog No. | Clone No.  | Dilution               |
|-----------------|--------------------|-------------------|-------------|------------|------------------------|
|                 | p63                | Abcam             | ab735       | 4A4        | 1:100 (IF)             |
|                 | Human nucleoli     | Abcam             | ab190710    | NM95       | 1:200 (IHC)            |
|                 | Muc5AC             | Abcam             | ab198294    | EPR16904   | 1:250 (IF) 1:500 (IHC) |
|                 | Involucrin         | Sigma             | HPA055211   | n/a        | 1:500 (IHC)            |
|                 | Ki67               | Abcam             | ab15580     | n/a        | 1:1000 (IF)            |
|                 | p75 NGFR           | Abcam             | ab52987     | EP1039Y    | 1:50 (IF)              |
|                 | CK14               | Proteintech       | 10143-1-AP  | n/a        | 1:400 (IF)             |
|                 | Fibronectin        | Proteintech       | 15613-1-AP  | n/a        | 1:200 (IF)             |
|                 | CK10               | Abcam             | ab76318     | EP1607IHCY | 1:200 (IF)             |
|                 | CK5                | Invitrogen        | MA5-14473   | EP1601Y    | 1:100 (IF)             |
|                 | Uteroglobin        | Invitrogen        | MA5-17170   | 3A8B8      | 1:200 (IF)             |
|                 | Foxj1              | Novus Biologicals | NBP1-87928  | n/a        | 1:200 (IF) 1:500 (IHC) |
|                 | Acetylated Tubulin | Sigma             | T7451       | 6-11B-1    | 1:30,000 (IF)          |
|                 | CK8                | Novus Biologicals | NBP1-48281  | OTI1B12    | 1:400 (IF)             |
|                 | BMP2               | Abcam             | ab214821    | EPR20807   | 1:150 (IF)             |
|                 | E-Cadherin         | Bio-Techne        | AF648       | n/a        | 1:200 (IF)             |

|                              |            |          |        |             |
|------------------------------|------------|----------|--------|-------------|
| Phospho-Smad1/5              | CST        | #9516    | 41D10  | 1:500 (IF)  |
| Phospho-Smad2                | CST        | #18338   | E8F3R  | 1:500 (IF)  |
| PTHLH                        | Affinity   | DF6532   | n/a    | 1:150 (IF)  |
| Aggrecan                     | Abcam      | ab3778   | 6-B-4  | 1:500 (IHC) |
| Osteocalcin                  | Abcam      | ab13418  | OC4-30 | 1:100 (IHC) |
| Donkey anti-Goat Alexa 488   | Invitrogen | A32814   |        |             |
| Donkey anti-Rabbit Alexa 594 | Invitrogen | A21207   |        |             |
| Goat anti-Rabbit Alexa 594   | Abcam      | ab150080 |        |             |
| Goat anti-Mouse Alexa 488    | Abcam      | ab150113 |        |             |

## Validation

Validation data / citations of all primary antibodies used in this study can be found on the manufacturer website by searching the antibody catalog number provided in methods section of our manuscript.

[Anti-p63 antibody [4A4] (ab735)] application: IHC-P; species reactivity: Human  
<https://www.abcam.com/p63-antibody-4a4-ab735.html>

[Anti-Human Nucleoli antibody [NM95] (ab190710)] application: WB, IHC-P, Flow Cyt (Intra), ICC; species reactivity: Human  
<https://www.abcam.com/Human-Nucleoli-antibody-NM95-Nucleolar-Marker-ab190710.html>

[Anti-Mucin 5AC antibody [EPR16904] (ab198294)] application: WB, IHC-P, ICC/IF; species reactivity: Human  
<https://www.abcam.com/mucin-5ac-antibody-epr16904-ab198294.html>

[Anti-IVL antibody [HPA055211]] application: IHC, IF; species reactivity: Human  
<https://www.sigmaaldrich.cn/CN/zh/product/sigma/hpa055211>

[Anti-Ki67 antibody (ab15580)] application: IHC-P, ICC; species reactivity: Mouse, Human  
<https://www.abcam.com/Ki67-antibody-ab15580.html>

[Anti-p75 NGF Receptor antibody [EP1039Y] (ab52987)] application: WB, IP, IHC-P, ICC/IF, Flow Cyt (Intra); species reactivity: Mouse, Rat, Human  
<https://www.abcam.com/p75-NGF-Receptor-antibody-EP1039Y-ab52987.html>

[Anti-Cytokeratin 14 antibody (10143-1-AP)] application: WB, IP, IHC, IF, FC (Intra); species reactivity: Human, Mouse, Rat  
<https://www.ptglab.com/products/KRT14-Antibody-10143-1-AP.htm>

[Anti-Fibronectin antibody (15613-1-AP)] application: WB, IP, IF, FC; species reactivity: Human, Mouse, Rat  
<https://www.ptglab.com/Products/FN1-Antibody-15613-1-AP.htm>

[Anti-Cytokeratin 10 antibody [EP1607IHCY] (ab76318)] application: ICC/IF, WB, IHC-P; species reactivity: Mouse, Rat, Human  
<https://www.abcam.com/cytokeratin-10-antibody-ep1607ihcy-cytoskeleton-marker-ab76318.html>

[Anti-Cytokeratin 5 antibody [EP1601Y] (MA5-14473)] application: WB, IHC-P, ICC/IF; species reactivity: Human, Mouse  
<https://www.thermofisher.cn/cn/zh/antibody/product/Cytokeratin-5-Antibody-clone-EP1601Y-Monoclonal/MA5-14473>

[Anti-Uteroglobin antibody [3A8B8] (MA5-17170)] application: WB, FC, ELISA; species reactivity: Human  
[https://www.thermofisher.cn/cn/zh/antibody/product/Uteroglobin-Antibody-clone-3A8B8-Monoclonal/MA5-17170?adobe\\_mc=MC MID%7C59062698389797485434394331790822104606%7CMCAID%3D2F53C7D58515EBD7-60000792AAD00F99%7CMCORGI D%3D5B135A0C5370E6B40A490D44%40AdobeOrg%7CTS=1614293705](https://www.thermofisher.cn/cn/zh/antibody/product/Uteroglobin-Antibody-clone-3A8B8-Monoclonal/MA5-17170?adobe_mc=MC MID%7C59062698389797485434394331790822104606%7CMCAID%3D2F53C7D58515EBD7-60000792AAD00F99%7CMCORGI D%3D5B135A0C5370E6B40A490D44%40AdobeOrg%7CTS=1614293705)

[Anti-FoxJ1/HFH4 antibody (NBP1-87928)] application: IHC, IHC-Fr, IHC-P; species reactivity: Human, Mouse  
[https://www.novusbio.com/products/foxj1-hfh4-antibody\\_nbp1-87928](https://www.novusbio.com/products/foxj1-hfh4-antibody_nbp1-87928)

[Anti-Acetylated Tubulin antibody [6-11B-1] (T7451)] application: WB, IHC, RIA, EM, DB; species reactivity: plant, hamster, rat, mouse, human, pig, monkey, frog, invertebrates, bovine, protista, chicken  
<https://www.sigmaaldrich.cn/CN/zh/product/sigma/t7451>

[Anti-Cytokeratin 8 Antibody [OTI1B12] (NBP1-48281)] application: WB, ICC/IF, IHC, IHC-P; species reactivity: Human, Mouse, Rat, Canine, Monkey  
[https://www.novusbio.com/products/cytokeratin-8-antibody-oti1b12\\_nbp1-48281](https://www.novusbio.com/products/cytokeratin-8-antibody-oti1b12_nbp1-48281)

[Anti-BMP2 antibody [EPR20807] (ab214821)] application: Flow Cyt (Intra), WB, ICC/IF; species reactivity: Mouse, Rat, Human  
<https://www.abcam.com/bmp2-antibody-epr20807-ab214821.html>

[Anti-Human/Mouse E-Cadherin antibody (AF648)] application: CyTOF-ready, Dual RNAscope ISH-IHC, Flow Cyt, IHC, IF, WB; species reactivity: Human, Mouse  
[https://www.bio-technie.com/cn/p/antibodies/human-mouse-e-cadherin-antibody\\_af648](https://www.bio-technie.com/cn/p/antibodies/human-mouse-e-cadherin-antibody_af648)

[Anti-Phospho-Smad1/5 (Ser463/465) [41D10] (#9516)] application: WB, IF, Flow Cyt; species reactivity: Human, Mouse, Rat

<https://www.cellsignal.com/products/primary-antibodies/phospho-smad1-5-ser463-465-41d10-rabbit-mab/9516>

[Anti-Phospho-SMAD2 (Ser465/Ser467) [E8F3R] (#18338)] application: WB, IP, IF, Flow Cyt, ChIP; species reactivity: Human, Mouse, Rat

<https://www.cellsignal.com/products/primary-antibodies/phospho-smad2-ser465-ser467-e8f3r-rabbit-mab/18338>

[Anti-PTHLH antibody (DF6532)] application: WB, IHC, IF/ICC, ELISA (peptide); species reactivity: Human, Mouse, Rat

<http://www.affbiotech.com/goods-5334.html>

[Anti-Aggregan antibody [6-B-4] (ab3778)] application: WB, IHC-P; species reactivity: Human, Recombinant fragment

<https://www.abcam.com/Aggregan-antibody-6-B-4-ab3778.html>

[Anti-Osteocalcin antibody [OC4-30] (ab13418)] application: WB, IHC-Fr, Sandwich ELISA, ICC/IF, IHC-P; species reactivity: Rat, Sheep, Rabbit, Goat, Cow, Dog, Human, Pig

<https://www.abcam.com/Osteocalcin-antibody-OC4-30-ab13418.html>

## Eukaryotic cell lines

Policy information about [cell lines](#)

|                                                                   |                                                                                                                                                                                                   |
|-------------------------------------------------------------------|---------------------------------------------------------------------------------------------------------------------------------------------------------------------------------------------------|
| Cell line source(s)                                               | Human bone marrow-derived multipotent stromal cells (MSC) were purchased from Fuyuan Biotechnology (Shanghai, China).                                                                             |
| Authentication                                                    | Cells were authenticated to be CD45+/CD73+/CD90+/CD105+/CD166+/CD11b-/CD34-/HLA-DR- using flow cytometry by provider right before shipment, and verified by differentiation assay upon receiving. |
| Mycoplasma contamination                                          | Cells were tested to be negative for mycoplasma contamination using TaKaRa PCR Mycoplasma Detection Set.                                                                                          |
| Commonly misidentified lines (See <a href="#">ICLAC</a> register) | No commonly misidentified cell line was used in this study.                                                                                                                                       |

## Animals and other organisms

Policy information about [studies involving animals](#); [ARRIVE guidelines](#) recommended for reporting animal research

| Laboratory animals      | <table> <thead> <tr> <th>Species</th> <th>Strain</th> <th>Cat. No.</th> <th>Sex</th> <th>Age</th> </tr> </thead> <tbody> <tr> <td>Mouse</td> <td>NOD-Prkdcscidll2rgem1/Smoc</td> <td>NM-NSG-001</td> <td>Both</td> <td>6-8 weeks (at the starting point of experiment)</td> </tr> </tbody> </table> <p>from Shanghai Model Organisms, China, <a href="https://www.modelorg.com/en/portal/article/index/id/841/post_type/3.html">https://www.modelorg.com/en/portal/article/index/id/841/post_type/3.html</a>.</p> <p>Animals were housed in SPF facility with room temperature 20-26°C, relative humidity 30-70%, with 12-hour dark/light cycles.</p> | Species    | Strain | Cat. No.                                        | Sex | Age | Mouse | NOD-Prkdcscidll2rgem1/Smoc | NM-NSG-001 | Both | 6-8 weeks (at the starting point of experiment) |
|-------------------------|-------------------------------------------------------------------------------------------------------------------------------------------------------------------------------------------------------------------------------------------------------------------------------------------------------------------------------------------------------------------------------------------------------------------------------------------------------------------------------------------------------------------------------------------------------------------------------------------------------------------------------------------------------|------------|--------|-------------------------------------------------|-----|-----|-------|----------------------------|------------|------|-------------------------------------------------|
| Species                 | Strain                                                                                                                                                                                                                                                                                                                                                                                                                                                                                                                                                                                                                                                | Cat. No.   | Sex    | Age                                             |     |     |       |                            |            |      |                                                 |
| Mouse                   | NOD-Prkdcscidll2rgem1/Smoc                                                                                                                                                                                                                                                                                                                                                                                                                                                                                                                                                                                                                            | NM-NSG-001 | Both   | 6-8 weeks (at the starting point of experiment) |     |     |       |                            |            |      |                                                 |
| Wild animals            | This study did not involve wild animals.                                                                                                                                                                                                                                                                                                                                                                                                                                                                                                                                                                                                              |            |        |                                                 |     |     |       |                            |            |      |                                                 |
| Field-collected samples | This study did not involve samples collected from the field.                                                                                                                                                                                                                                                                                                                                                                                                                                                                                                                                                                                          |            |        |                                                 |     |     |       |                            |            |      |                                                 |
| Ethics oversight        | All experiments were conducted in accordance with the regulations of IACUC committee of Shanghai Sixth People's Hospital.                                                                                                                                                                                                                                                                                                                                                                                                                                                                                                                             |            |        |                                                 |     |     |       |                            |            |      |                                                 |

Note that full information on the approval of the study protocol must also be provided in the manuscript.

## Human research participants

Policy information about [studies involving human research participants](#)

|                            |                                                                                                                                                                                                                                                                                                                                                                                                                                                                                                                             |
|----------------------------|-----------------------------------------------------------------------------------------------------------------------------------------------------------------------------------------------------------------------------------------------------------------------------------------------------------------------------------------------------------------------------------------------------------------------------------------------------------------------------------------------------------------------------|
| Population characteristics | This study recruited seven non-TO control donors and six TO patients that had been clinically and histopathologically diagnosed from the study period since 2018. Details of the covariate-related population characteristics of human research participants (such as age, gender, smoking history) were provided in Table 1.                                                                                                                                                                                               |
| Recruitment                | We recruited all diagnosed patients with complete basic information and evidenced by symptomatic, CT, bronchoscopy and histological indications.                                                                                                                                                                                                                                                                                                                                                                            |
| Ethics oversight           | The study protocol was approved by the Ethics Committee of Shanghai Sixth People's Hospital, and informed consent was obtained from all individuals recruited for this study. The study design and conduct complied with all relevant regulations regarding the use of human study participants and was conducted in accordance with the criteria set by the Declaration of Helsinki. For recruited individuals, cytological examination, bronchoscopy and follow-up consultation were provided for free as a compensation. |

Note that full information on the approval of the study protocol must also be provided in the manuscript.
